1 **Optical TrkB activation in Parvalbumin interneurons regulates intrinsic states to orchestrate**  
2 **cortical plasticity**

3  
4

5 Frederike Winkel<sup>1</sup>, Mathias B. Voigt<sup>1</sup>, Giuliano Didio<sup>1</sup>, Salomé Matéo<sup>2</sup>, Elias Jetsonen<sup>1</sup>, Maria Llach  
6 Pou<sup>1</sup>, Anna Steinzeig<sup>1</sup>, Maria Ryazantseva<sup>3,1</sup>, Juliana Harkki<sup>1</sup>, Jonas Englund<sup>3,1</sup>, Stanislav Khirug<sup>1</sup>,  
7 Claudio Rivera<sup>1</sup>, Satu Palva<sup>1</sup>, Tomi Taira<sup>4, 1</sup>, Sari E. Lauri<sup>3,1</sup>, Juzoh Umemori<sup>1§</sup>, Eero Castrén<sup>1</sup>

8

9 1 Neuroscience Center, HiLIFE, University of Helsinki, Finland.

10 2 Master de Neurosciences Moléculaires, Cellulaires et Intégrées Aix-Marseille University

11 3 Molecular and Integrative Biosciences Research Programme, University of Helsinki, Finland

12 4 Department of Veterinary Biosciences and Neuroscience Center, University of Helsinki, Finland

13

14 § Corresponding author

15 Juzoh Umemori,

16 Neuroscience center, HiLife, University of Helsinki, 00790 Helsinki, Finland

17 Phone +358-45-1578-930

18 [juzoh.umemori@helsinki.fi](mailto:juzoh.umemori@helsinki.fi)

19

20

21

22

## 23 Graphical Abstract

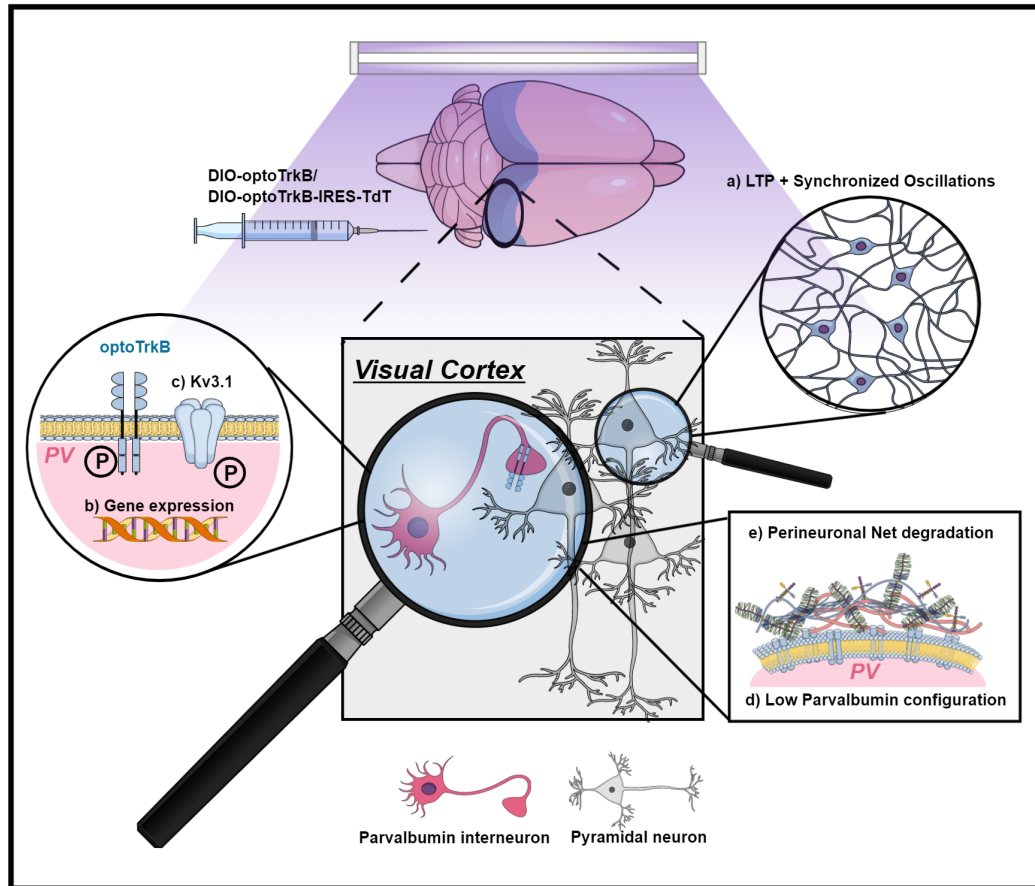

24  
25

26

27

28

29

30

31

32

## 33 **Abstract**

34 Activation state of Parvalbumin (PV) interneurons regulates neuronal plasticity, driving the closure  
35 of developmental critical periods and alternating between high and low plasticity states in response  
36 to experience in adulthood. We now show that PV plasticity states are regulated through the  
37 activation of TrkB neurotrophin receptors. Activation of an optically activatable TrkB (optoTrkB)  
38 specifically in PV interneurons switches adult cortical networks into a state of elevated plasticity  
39 within minutes by decreasing excitability of PV neurons. OptoTrkB activation induces changes in  
40 gene expression related to neuronal plasticity and excitability, and increases the phosphorylation of  
41 Kv3.1 channels. OptoTrkB activation shifted cortical networks towards a low PV configuration,  
42 promoting oscillatory synchrony and ocular dominance plasticity. Visual plasticity induced by  
43 fluoxetine was lost in mice lacking TrkB in PV neurons. Our data suggest a novel mechanism that  
44 dynamically regulates PV interneurons configuration state and orchestrates cortical networks  
45 during adulthood.

46

47

48

49

50

51

## 52 **Introduction**

53 Brain plasticity is a key process to allow learning and adjust maladapted networks throughout life.  
54 The brain is particularly plastic during critical periods of early postnatal life (Hensch, 2005), and  
55 transition to a state of more limited plasticity in the adult brain coincides with the maturation of  
56 GABAergic parvalbumin-expressing (PV) interneurons. The role of the PV interneuron network has  
57 been best described for the critical period in the primary visual cortex, which is typically determined  
58 through ocular dominance plasticity (Huang et al., 1999; Jiang et al., 2010; Pizzorusso et al., 2002) .  
59 PV interneuron maturation is promoted by brain-derived neurotrophic factor (BDNF) signalling  
60 (Huang et al., 1999) and the assembly of perineuronal nets (PNNs) (Pizzorusso et al., 2002),  
61 extracellular matrix components rich in chondroitin sulphate proteoglycans preferentially encasing  
62 PV interneurons. PV interneurons remain intrinsically plastic during adulthood, and external stimuli  
63 can switch the configurations of PV interneurons between plastic/immature and consolidated states  
64 as defined by low- and high-expression, respectively, of PV in these cells (Donato et al., 2013).

65 Increasing evidence has shown that a critical period-like state of plasticity can be evoked during  
66 adulthood by interventions, such as environmental enrichment (Sale et al., 2007) and  
67 antidepressant treatment (Karpova et al., 2011; Maya-Vetencourt et al., 2008; Mikics et al., 2018).  
68 Studies in the visual cortex have shown that adult ocular dominance plasticity is associated with  
69 decreased inhibitory activity thought to be driven by the PV interneuron network (Harauzov et al.,  
70 2010; Lensjø et al., 2017). However, the mechanisms underlying the switch in network states have  
71 remained a knowledge gap.

72 Considering that brain plasticity is an activity-dependent process that involves neurotrophin  
73 signaling, we hypothesized that the activity of the BDNF receptor neurotrophic receptor tyrosine

74 kinase B (TrkB) within PV interneurons could regulate metabolic processes to mediate PV plasticity  
75 states during adulthood. TrkB is expressed in the majority of neurons, therefore, BDNF application  
76 to study TrkB functions in specific neuron populations holds considerable limitations (Gorba & Wahle,  
77 1999; Kuczewski et al., 2009).

78 Here, we modified and optimized an optically activatable TrkB (optoTrkB) (Chang et al., 2014; Fenno  
79 et al., 2014) that can be expressed and activated in PV interneurons in a cre-dependent manner. This  
80 tool then allowed us to study the mechanisms underlying TrkB activity in PV interneurons and its  
81 effects on visual cortex plasticity as a well-defined model network. This optogenetic approach differs  
82 substantially from traditional channelrhodopsin experiments as the activation of optoTrkB allows us  
83 to control a relatively slowly developing, physiologically relevant molecular pathway.

84 We show here that optoTrkB activation specifically in PV interneurons in the primary visual cortex  
85 during 7 days of monocular deprivation (MD) was sufficient to reinstate ocular dominance plasticity.  
86 More strikingly, a single 30 seconds blue light stimulation of optoTrkB in PV interneurons resulted in  
87 LTP inducibility within 30 minutes and enhanced oscillatory synchrony in the visual cortex of adult  
88 mice. Subsequent single-nuclei sequencing revealed that activation of optoTrkB in PV interneurons  
89 rapidly induces changes in the expression of genes related to neuronal excitability and plasticity,  
90 such as *Grin1* and *Grik3*, subunits of the NMDA and kainate receptor, respectively. Surprisingly, also  
91 PV expression itself appeared to be regulated through TrkB activation. Consistently, we found a rapid  
92 decrease in PV intrinsic excitability and spontaneous excitatory postsynaptic current (sEPSC)  
93 frequencies after optoTrkB activation, as well as increased phosphorylation of the PV specific Kv3.1  
94 channels. In line with our single-nuclei sequencing data, we found that TrkB activation in PV  
95 interneurons dynamically regulates PV and PNN configuration states, resetting the neuronal network  
96 into a plastic, immature-like state. Conversely, deleting TrkB from PV interneurons blocked these

97 effects when induced pharmacologically using fluoxetine treatment. These findings demonstrate  
98 that TrkB activation in PV interneurons rapidly orchestrates cortical network plasticity by regulating  
99 intrinsic states and provide new evidence for its role in intracortical inhibition and plasticity modes  
100 during adulthood.

101

## 102 **Results**

### 103 **TrkB activation in PV interneurons induces visual cortex plasticity**

104 Using BDNF to study cell type-specific functions of TrkB has critical caveats as it can activate TrkB  
105 receptors in any neuron expressing it. To be able to specifically activate TrkB in PV interneurons, we  
106 optimized and modified an optically activatable TrkB (optoTrkB) where addition of a plant-derived  
107 photolyase homology region (PHR) domain into the C-terminus of full-length TrkB mediates light-  
108 induced dimerization of TrkB monomers (Chang et al., 2014) (Fig. 1A) (Figure S1A). We infected the  
109 V1 of adult mice specifically expressing cre recombinase in PV interneurons (PV-cre) with a lentivirus  
110 expressing a double-floxed inverted open reading frame of opto-TrkB (DIO-optoTrkB) to specifically  
111 express optoTrkB in PV interneurons (Figure S1B). Acute light activation of optoTrkB in V1 resulted  
112 in increased phosphorylation of TrkB and CREB (Figure S2A-S2E), suggesting successful activation of  
113 optoTrkB and downstream signalling *in vivo*.

114 We then infected the V1 of adult PV-cre mice with DIO-optoTrkB lentivirus and subjected these mice  
115 to the standard protocol of ocular dominance (OD) plasticity induced by 7 days of monocular  
116 deprivation (MD) (see Material&Methods). As expected, mice infected with the lentivirus but having  
117 their transparent skull (Steinzeig et al., 2017) painted black to prevent light stimulation, failed to  
118 show any OD plasticity. In contrast, when the DIO-optoTrkB infected adult primary visual cortex (V1)

119 was stimulated twice daily for 30 seconds by blue light through a transparent skull (Fig. 1B) during 7  
120 days of MD, we observed a shift in ocular dominance index (ODI) towards the non-deprived  
121 ipsilateral eye (Fig.1C). The shift persisted for a week in the absence of visual deprivation or light  
122 stimulation (Fig. 1C). We then closed the eye that had been left open during the first MD session  
123 and again exposed the cortex to light twice daily for 7 days and again observed a shift towards the  
124 non-deprived eye (Fig. 1C). Light stimulation alone without DOI-optoTrkB virus infection during 7  
125 days of MD had no effect on visual cortex plasticity (Figure. S2F).

126 A shift in ocular dominance takes several days to occur but we reasoned that direct activation of  
127 optoTrkB through light stimulation might have more immediate effects. We therefore studied the  
128 induction of long-term potentiation (LTP) as another proxy for visual cortex plasticity. LTP occurrence  
129 through theta-burst stimulation (TBS) in V1 is normally restricted to critical periods (Kirkwood et al.,  
130 1996). While TBS stimulation (Kirkwood & Bear, 1994) of acute V1 slices expressing optoTrkB in PV  
131 interneurons but kept in darkness did not induce LTP in slices, a robust LTP was induced in slices  
132 exposed for 30 seconds to blue light 30 minutes before the TBS stimulation (Fig.1D). These results  
133 suggest that direct activation of TrkB receptors in PV interneurons promotes excitatory transmission  
134 and plasticity within minutes.

135 Plasticity in the visual cortex is controlled locally by synchronized neuronal oscillations, which are  
136 regulated by the activity of PV interneurons (Galuske et al., 2019; Lee et al., 2012). *In vivo* local field  
137 potential (LFP) recordings of neuronal activity from V1 revealed a progressive increase in the  
138 broadband (4–112 Hz) LFP power in response to a 30-second long optoTrkB activation (Fig. 1E). The  
139 broadband magnitude at 100 minutes after stimulation showed a significant increase when  
140 compared to the pre-stimulation baseline. Furthermore, no increase in the broadband magnitude  
141 was observed in optoTrkB infected control animals stimulated with infrared light (780nm) (Fig. 1F,

142 H). We also found increases in the magnitude at the separate frequency bands, particularly in alpha  
143 ( $\alpha$ ) and gamma ( $\gamma$ ) range at 100 minutes after optoTrkB activation compared to baseline (Fig. 1G).  
144 Together, these results suggest that optoTrkB activation in PV interneurons promotes synchronized  
145 oscillations, which renders the network state of the visual cortex responsive and permissive for  
146 plasticity.

147

### 148 **TrkB regulates plasticity-related genes in PV interneurons**

149 To identify the molecular mechanisms regulated by optoTrkB activation in PV interneurons, we  
150 performed single nuclei RNA sequencing (snRNA-seq) of visual cortical samples from DIO-optoTrkB-  
151 TdTomato (Figure S1C and S1D) transfected PV-cre mice 60 minutes after a 30-second light  
152 stimulation (Figure S3A). Single cell RNA sequencing was not feasible due to potential light-induced  
153 optoTrkB activation during cell extraction and processing (Figure S3B). Integrated data analysis (see  
154 Material&Methods) identified 18 clusters of neurons, including a cluster containing PV interneurons  
155 (Fig. 2A; Figure S4 and S5; Table S1-S3), which was further divided into four PV interneuron clusters  
156 using PCA analysis (Fig. 2B and 2C; Figure S6 and S7; Table S4). *Arc*, a known downstream signal of  
157 TrkB (Messaoudi et al., 2002, 2007; Yin et al., 2002; Ying et al., 2002), was only up-regulated in PV  
158 cluster 3 of the light-stimulated group, along with other immediate early genes, such as, *Jun* and  
159 *Egr1* (Fig. 2E), indicating that this cluster harbours optoTrkB transfected PV cells. In this cluster, genes  
160 related to dendrite morphogenesis, synaptic plasticity, and regulation of excitatory postsynaptic  
161 currents (EPSC) were differentially regulated in the light-exposed group (Fig. 2D) (Table S5). Strikingly,  
162 we found a decrease in *PV* expression itself among them (Fig. 2E), and this decrease was confirmed  
163 by qPCR (Figure S10). Particularly interesting is the downregulation of *Grin1* and *Grik3* that code for  
164 subunits of N-methyl-D-aspartate receptor (NMDA) and kainate receptors, respectively, and



165 *Homeobox protein cut-like 2 (Cux2)* (fold value, 0.63, Table S6), all being essential components of  
166 excitatory synapses (Fig. 2E). Furthermore, *Leucine Rich Repeat And Ig Domain Containing 2 (Lingo-*  
167 *2)* that is broadly expressed in neurons was reduced after optoTrkB activation (fold value, 0.46, Table  
168 S6). Finally, we found an upregulation of the insulin-like growth factor 1 (IGF-1) receptor (*Igf1r*)  
169 expression (fold value, 1.29, Table S5), which shares many components with the BDNF pathway  
170 (Zheng & Quirion, 2004)

171 These results suggest that optoTrkB activation in PV interneurons changes the gene expression  
172 profile to particularly regulate the PV intrinsic properties.

173

#### 174 **TrkB activation in PV interneurons reduces cell excitability**

175 We next sought to validate the functional effects of optoTrkB activation on the intrinsic properties  
176 of PV interneurons. We therefore obtained patch clamp recordings from optoTrkB-positive PV  
177 interneurons in the V1 co-expressing TdTomato (Figure S1C and S1D). OptoTrkB was activated 10-60  
178 minutes before the recordings using a 30-second blue light stimulation. We first recorded the  
179 intrinsic excitability by injecting current steps ranging from -100 to 600 pA. Strikingly, the intrinsic  
180 excitability of PV cells in optoTrkB stimulated slices was significantly lower 30-60 min after activation  
181 when compared to the non-activated controls (Fig. 3A and 3F) (Table S6A), and was accompanied by  
182 trends towards increased action potential (AP) half-width (Fig. 3B and 3F). We subsequently  
183 recorded spontaneous EPSCs (sEPSC) and found that the frequency of sEPSCs was also decreased in  
184 optoTrkB activated PV interneurons compared to controls (Fig. 3C and 3F), confirming functional  
185 changes in excitatory transmission onto PV interneurons. Neither the sEPSC amplitudes nor the  
186 frequency or amplitudes of spontaneous inhibitory postsynaptic currents (sIPSC) were changed

187 (data not shown), suggesting that optoTrkB activation specifically affects excitatory inputs.

188 Potassium currents are known to regulate intrinsic excitability of neurons and Kv3 channels that are  
189 highly expressed in cortical PV interneurons regulate the fast-spiking properties (Chow et al., 1999;  
190 Du et al., 1996). Furthermore, Kv3.1 channels are directly inhibited by phosphorylation through PKC  
191 (Song & Kaczmarek, 2006), a downstream target of TrkB signaling. We therefore hypothesized that  
192 optoTrkB activation could result in enhanced phosphorylation or reduced expression of Kv3.1  
193 channels. First, we immunohistochemically examined the expression intensities of phospho-Kv3.1  
194 within PV interneurons and found that optoTrkB activation resulted in increased phospho-Kv3.1  
195 expression in PV interneurons in visual cortical slices (Fig. 3D and 3E), which is consistent with  
196 reduced excitability. We then used qPCR with tissue samples from the V1 of optoTrkB-infected PV-  
197 cre mice 15 min, 30 min or 60 min after light stimulation to measure mRNA expression of Kv3.1 and  
198 Kv3.2 channels. The expression of Kv3.2 mRNA was significantly reduced and there was a progressive  
199 trend toward reduction for Kv3.1 mRNA ( $p = 0.0923$ ) at 60 min after light stimulation (Fig. 3G and  
200 3H). These data suggest that optoTrkB activation inhibits Kv3.1 potassium channels through  
201 phosphorylation and regulates Kv3.1 and Kv3.2 mRNA expression, thereby reducing the intrinsic  
202 excitability of PV interneurons.

203

#### 204 **TrkB activation regulates PV-plasticity**

205 PV expression itself is plastic and regulated by experience (Donato et al., 2013, 2015; Karunakaran  
206 et al., 2016), low PV expression being associated with plastic and high PV with consolidated networks.  
207 In addition, PV interneurons become gradually enwrapped by PNN during critical periods (Jiang et  
208 al., 2005) and PNN removal during adulthood reinstates a juvenile-like plasticity and reduces

209 intracortical inhibition (Lensjø et al., 2017; Pizzorusso et al., 2002). As our snRNA-seq data revealed  
210 that optoTrkB activation decreases PV expression, we hypothesized that optoTrkB activation could  
211 directly mediate PV and PNN plasticity states. Indeed, activation of optoTrkB in the V1 PV  
212 interneurons for 30 seconds twice daily for 7 days reduced the PV intensities particularly in the  
213 subgroup of PV interneurons expressing high levels of PV (Fig. 4A, B) and the PNN intensities were  
214 also reduced in the same high-PV subgroup (Fig. 4C), suggesting a switch towards a low PV  
215 expressing network state. We next reasoned that a reduction in PNN intensities could correlate with  
216 a decrease in PNN expression and quantified the numbers of PNNs. We found that optoTrkB  
217 activation reduced the numbers of PNN-positive (PNN<sup>+</sup>), PV/PNN-double-positive (PV<sup>+</sup>PNN<sup>+</sup>) cells,  
218 and PV<sup>+</sup>PNN<sup>+</sup> cells within the PV population (Fig. 4D-G), suggesting that PV interneurons switch to a  
219 critical period-like state after optoTrkB activation.

220

### 221 **TrkB activation in PV interneurons is necessary for induction of visual cortex plasticity**

222 Together, our findings demonstrate that TrkB activity in PV interneurons is sufficient to render the  
223 cortical network towards a plastic configuration state. We wondered, however, whether TrkB activity  
224 is also necessary for it. To test this hypothesis, we used a “loss-of-function” approach using  
225 conditional heterozygous mice with PV-specific TrkB knockout (hPV-TrkB CKO) and pharmacologically  
226 induced plasticity using chronic fluoxetine treatment. Using again the standard protocol for ocular  
227 dominance plasticity, we confirmed our previous findings that chronic fluoxetine treatment induced  
228 a shift of ocular dominance in combination with MD in the adult V1 of wild-type mice (WT) (Maya-  
229 Vetencourt et al., 2008; Steinzeig et al., 2017). However, no OD shift was seen in hPV-TrkB CKO mice  
230 in response to MD during chronic fluoxetine treatment (Fig. 5A). Consistently, chronic fluoxetine  
231 treatment also permitted LTP induction after TBS stimulation, as previously reported (Maya-

232 Vetencourt et al., 2008), but this effect was absent in hPV-TrkB CKO mice (Fig. 5B). These data suggest  
233 that TrkB activation in the visual cortex is necessary for fluoxetine-induced adult plasticity.

234

### 235 **TrkB expression is necessary for fluoxetine-induced changes in PV intrinsic properties**

236 We then sought to validate whether the underlying mechanisms of fluoxetine-induced plasticity are  
237 similar to those induced by optoTrkB activation. Indeed, similarly to what was observed after  
238 optoTrkB activation in PV interneurons, chronic fluoxetine treatment reduced intrinsic excitability  
239 (Fig. 6A, Fig.S7) (Table S6B), increased AP half-width (Fig. 6B, Fig.S7) and produced a trend towards  
240 a decrease in sEPSC frequency ( $p = 0.5397$ ) (Fig. 6C, Fig.S7) in PV interneurons in WT mice, but none  
241 of these responses to fluoxetine were seen in hPV-TrkB CKO mice.

242 Finally, again in alignment with responses to optoTrkB, we found that chronic fluoxetine treatment  
243 reduced PV and PNN intensities among the high PV expressing population (Fig. 6D, E) and PNN<sup>+</sup>  
244 abundance within the PV population in WT (Fig. 6F, G, H) but not in hPV-TrkB CKO mice (Fig. 6F-H).  
245 Taken together, these results strongly suggest that TrkB activation in PV interneurons is both  
246 necessary and sufficient to regulate PV intrinsic properties and switch the visual cortex to a state of  
247 high plasticity.

248

249

## 250 **Discussion**

251 Our data show that TrkB signalling powerfully regulates the intrinsic activity of PV interneurons and  
252 thereby orchestrates cortical plasticity. TrkB activation in PV interneurons switches the intrinsic state  
253 of PV interneurons towards low excitability resulting in disinhibition and induction of critical period-  
254 like plasticity in cortical networks. Conversely, inhibition of TrkB signalling prevents induction of  
255 plasticity produced by fluoxetine treatment. Using optoTrkB as a methodological advancement we  
256 could show that TrkB particularly affects the expression of genes involved in synaptic transmission  
257 and intrinsic excitability as well as *PV* itself. The functional consequences of these changes are  
258 expressed in an increase of excitatory transmission, synchronized oscillations and visual cortex  
259 plasticity.

260

### 261 **TrkB activation in PV interneurons induces plasticity in adult brain**

262 We previously demonstrated that chronic fluoxetine treatment can reactivate ocular dominance  
263 plasticity in the adult visual cortex ( Maya-Vetencourt et al., 2008; Steinzeig et al., 2017). This effect  
264 was accompanied by a reduction in intracortical GABAergic transmission as measured by decreased  
265 extracellular basal GABA levels; induction of LTP after TBS stimulation and increased BDNF protein  
266 levels, strongly suggesting a regulatory role of intracortical inhibition in adult visual cortex plasticity  
267 (Maya-Vetencourt et al., 2008).

268 Although PV interneurons cover only a small percentage of the total neuronal population, their  
269 extensive axonal arborization enable strong inhibitory control over pyramidal cells (Hu et al., 2014).

270 As BDNF promotes the maturation of PV cells during critical periods, we hypothesized that TrkB  
271 activation in PV interneurons could also affect plasticity processes during adulthood. Considering

272 that administration of BDNF and fluoxetine activate all TrkB receptors expressed in the majority of  
273 neurons, we developed a cre-dependent optoTrkB to circumvent this problem and to be able to  
274 specifically activate TrkB signaling in PV interneurons only. Strikingly, while BDNF-induced TrkB  
275 activation during critical periods promotes the maturation of PV interneurons (Huang et al., 1999),  
276 TrkB activation in PV interneurons during adulthood reinstates a critical period-like plasticity  
277 machinery through rejuvenating these interneurons. These findings suggest that the plasticity  
278 machinery remains intact in the adult brain but needs the right tools to be reactivated.

279

#### 280 **Differential effects of TrkB activation in pyramidal neurons and interneurons?**

281 Reactivation of critical period-like plasticity in the adult brain is associated with reduced cortical  
282 inhibition and subsequent disinhibition of cortical networks (Hensch, 2005). BDNF has been shown  
283 to strongly promote neuronal activity, excitability (Figurov et al., 1995; Levine et al., 1995, 1998) and  
284 LTP (Kang & Schuman, 1994; Minichiello, 2009) in hippocampal and cortical excitatory neurons. In  
285 contrast, we found that optical activation of TrkB specifically in PV interneurons decreases  
286 excitability in PV cells and promotes field LTP in the visual cortex, indicating an increase in network-  
287 wide excitatory transmission and dynamics. These findings suggest that activation of TrkB produces  
288 differential effects on the cell excitability, increasing and decreasing it in pyramidal neurons and  
289 interneurons, respectively. Importantly, however, from the point of view of cortical networks, these  
290 differential effects on excitability cooperatively drive increased network activity, through enhanced  
291 excitability of pyramidal neurons and reduced activity of inhibitory neurons.

292

#### 293 **Activation of TrkB mediates intrinsic changes in PV interneurons to enhance excitatory**

294 **transmission in the visual cortex**

295 The hallmark of PV interneurons is their high-frequency firing, which is enabled by the high  
296 expression of voltage-gated Kv3 channels (Chow et al., 1999; Hu et al., 2014). Kv3 channels are  
297 characterized by their fast deactivation during membrane repolarization, enabling sustained high-  
298 frequency firing. A decrease in Kv3 channel expression as well as their inhibition through PKC  
299 mediated phosphorylation is known to reduce cell excitability (Rudy et al., 1999; Song & Kaczmarek,  
300 2006). PKC is a downstream target of TrkB signaling (Minichiello, 2009) and our data show that TrkB  
301 activation in PV interneurons results in enhanced phosphorylation of Kv3.1 and decreased  
302 expression of Kv3.1 and Kv3.2 channels, demonstrating control of TrkB signaling over PV intrinsic  
303 excitability. The decreased firing frequency of PV cells in turn enhances excitatory transmission  
304 necessary for visual cortex plasticity. The maturation of PV cells throughout critical period is  
305 concurrent with an increase in the fast-spiking firing frequency and an increase in Kv3.1 expression  
306 (Du et al., 1996; Plotkin et al., 2005). Interestingly, the fast-spiking properties of PV interneurons  
307 fails to develop in BDNF null mice (Itami et al., 2007). Considering that Kv3.1 channels are specifically  
308 expressed in high-frequency firing neurons, this could account for the differential effects of TrkB  
309 actions in pyramidal cells and PV interneurons.

310

311 **OptoTrkB-induced changes in gene expression in PV interneurons**

312 Using snRNA-seq, we found genes that were differentially regulated after optoTrkB activation in PV  
313 interneurons. Particularly the expression of genes related to excitatory transmission, synaptic  
314 plasticity and excitability was affected. *Grin1* and *Grik3* are subunits of the NMDA and kainate  
315 receptor, respectively, and these essential components of excitatory synapses were reduced by

316 optoTRKB activation. Knocking out *Grin1* in PV interneurons enhances network oscillations,  
317 particularly theta and gamma frequencies (Korotkova et al., 2010). The specific function of the *Grik3*  
318 subunit is not fully characterized, but kainate receptors have been shown to regulate both the  
319 maturation and excitability of GABAergic interneurons (Jack et al., 2019; Segerstråle et al., 2010), as  
320 well as the generation of synchronized activity at the level of neuronal networks (Bartos et al., 2007).  
321 As both NMDA and kainate receptors are known to mediate and modulate excitatory synaptic  
322 transmission (Zhang et al., 2013), the downregulation of *Grin1* and *Grik3* might therefore contribute  
323 to the changes in intrinsic properties of PV interneurons. In addition, we observed a decrease of  
324 *Cux2*, deletion of which reduces the amplitude and lowers the frequency of mEPSC (Cubelos et al.,  
325 2010). Furthermore, *Lingo-2* that is broadly expressed in neurons was reduced after optoTrkB  
326 activation, and the *Lingo* family members act as negative regulators of TrkB signalling (Meabon et  
327 al., 2016). Finally, we found an upregulation of the *Igf1r* expression. IGF-1 is another neurotrophic  
328 factor and shares components with the intracellular pathway of BDNF (Zheng & Quirion, 2004).  
329 Studies from the visual cortex have shown that IGF-1 reactivates ocular dominance plasticity and  
330 reduces GABAergic transmission in the adult visual cortex (Maya-Vetencourt et al., 2012).  
331 Upregulation of the IGF-1 receptor could render PV interneurons more responsive to IGF-1, thereby  
332 further contributing to a decrease in GABAergic transmission.

333

### 334 **Activation of optoTrkB regulates PV plasticity**

335 Exciting research suggests that PV interneurons show intrinsic plasticity and can change between  
336 high and low plasticity states when exposed to different environmental conditions (Donato et al.,  
337 2013). For example, environmental enrichment that is known to promote neuronal plasticity,  
338 induces a low PV-expressing network state. In contrast, contextual fear conditioning that is



339 associated with network consolidation, shifts the PV network into a high-PV expressing state (Donato  
340 et al., 2013). Additionally, PV expression progressively increases throughout development and could  
341 therefore also account for the reduction in brain plasticity during adulthood (Donato et al., 2013;  
342 Umemori et al., 2015). Interestingly, TrkB activation in PV interneurons can regulate PV plasticity  
343 states, and this effect may be mediated through direct regulation of PV mRNA expression as  
344 confirmed by single nuclei sequencing and qPCR. As PV is a Ca<sup>2+</sup> buffer, a low PV expressing state  
345 could also directly regulate PV interneuron firing (Eggermann & Jonas, 2012; Hu et al., 2014)

346 In the hippocampus, PV intensity is generally higher in PV cells enwrapped by PNNs and PV cells with  
347 weak staining intensity often lack PNNs (Yamada et al., 2015). The maturation of the PV network is  
348 associated with the formation of PNNs (Pizzorusso et al., 2002). Enzymatic digestion of PNNs  
349 restores plasticity in adulthood (Lensjø et al., 2017; Pizzorusso et al., 2002) and results in a decrease  
350 in PV intensity and PV mRNA levels, suggesting a correlation between PNN expression and PV  
351 configuration states (Yamada et al., 2015). In fact, a recent study by Devienne et al. demonstrates  
352 that transient electrical silencing of visual cortical PV interneurons induces a regression of PNN  
353 (Devienne et al., 2019), indicating a causal relationship between PV activity and the accumulation of  
354 PNNs. Our data suggest that TrkB activation within PV interneurons directly regulates PV expression  
355 and leads to the reduction in PNN levels, thereby contributing to the plasticity state of PV neurons.

356 In conclusion, we show that TrkB receptor activation within PV interneurons is sufficient and  
357 necessary to rapidly reduce their excitability and plasticity state, thereby changing cortical network  
358 dynamics. Hence, TrkB activity in PV cells dynamically controls network rewiring, learning and  
359 consolidation. Although we used the visual cortex as a model network, these mechanisms might be  
360 extrapolated to other brain areas, such as the hippocampus and amygdala, and therefore aids in the  
361 understanding of the pathophysiology of neuropsychiatric disorders and the rational design of

362 clinical interventions.

363

## 364 **Acknowledgments**

365 We thank Drs. Beatriz Rico and Oscar Marín for their comments on the manuscript. We thank our  
366 lab technicians Sulo Kolehmainen and Outi Nikkilä for technical and practical help to realize the  
367 experiments. We also thank the animal caretakers in the Laboratory Animal Center of the University  
368 of Helsinki (UH) for help and support with the animals, and Louisa Böttcher, Mirko Torheiden and  
369 Marvin Krampe for their help with the Western Blots. We also thank Noora Aarnio and Nina M  
370 Peitsaro in the Biomedicum Flow cytometry unit for helping FACS, and Jenni Lahtela and Bshwa  
371 Ghimire in FIMM Single Cell Analytics core facility supported by UH and Biocenter Finland. In  
372 addition, we are grateful to Eija Korpelainen and Maria Lehtivaara in CSC for helping to run Chipster.  
373 Castrén lab was supported by the ERC grant # 322742 – iPLASTICITY, the Sigrid Jusélius foundation,  
374 Jane & Aatos Erkko Foundation, Academy of Finland grants #294710, # 327192 and #307416, EU  
375 Joint Programme - Neurodegenerative Disease Research (JPND) *CircProt* project co-funded by EU  
376 and Academy of Finland #643417, the doctoral program Brain&Mind and the bilateral exchange  
377 program between Academy of Finland and JSPS (Japan Society for the Promotion of Science).

378

## 379 **Declaration of competing interests**

380 EC has received a lecturer fee from Jansen Cilac.

381

## 382 **Author contributions**

383 F.W., J.U. and E.C. conceived and designed the project. F.W. performed the experiments. M.V.  
384 analyzed the in vivo electrophysiology recordings under the supervision of S.P.. G.D. helped with the  
385 Western Blot experiments. M.L. cut the brains on the vibratome and helped with

386 immunohistochemistry. E.J., S.M., and J.U. helped with single nuclei sequencing experiments and  
387 data analysis. A.S. helped with the behavioral experiment using hPV-TrkB CKO mice combined with  
388 fluoxetine treatment. J.H. analyzed the PV/PNN intensities. S.K., C.R., J.E., M.R., S.K., T.T. and S.L.  
389 provided supervision and support during the electrophysiological experiments. F.W., J.U. and E.C.  
390 wrote the manuscript.

391

392

393

394

395

396

397

398

399

400

401

402

403

404

405

406

407

408

409

410

411 **Figures**

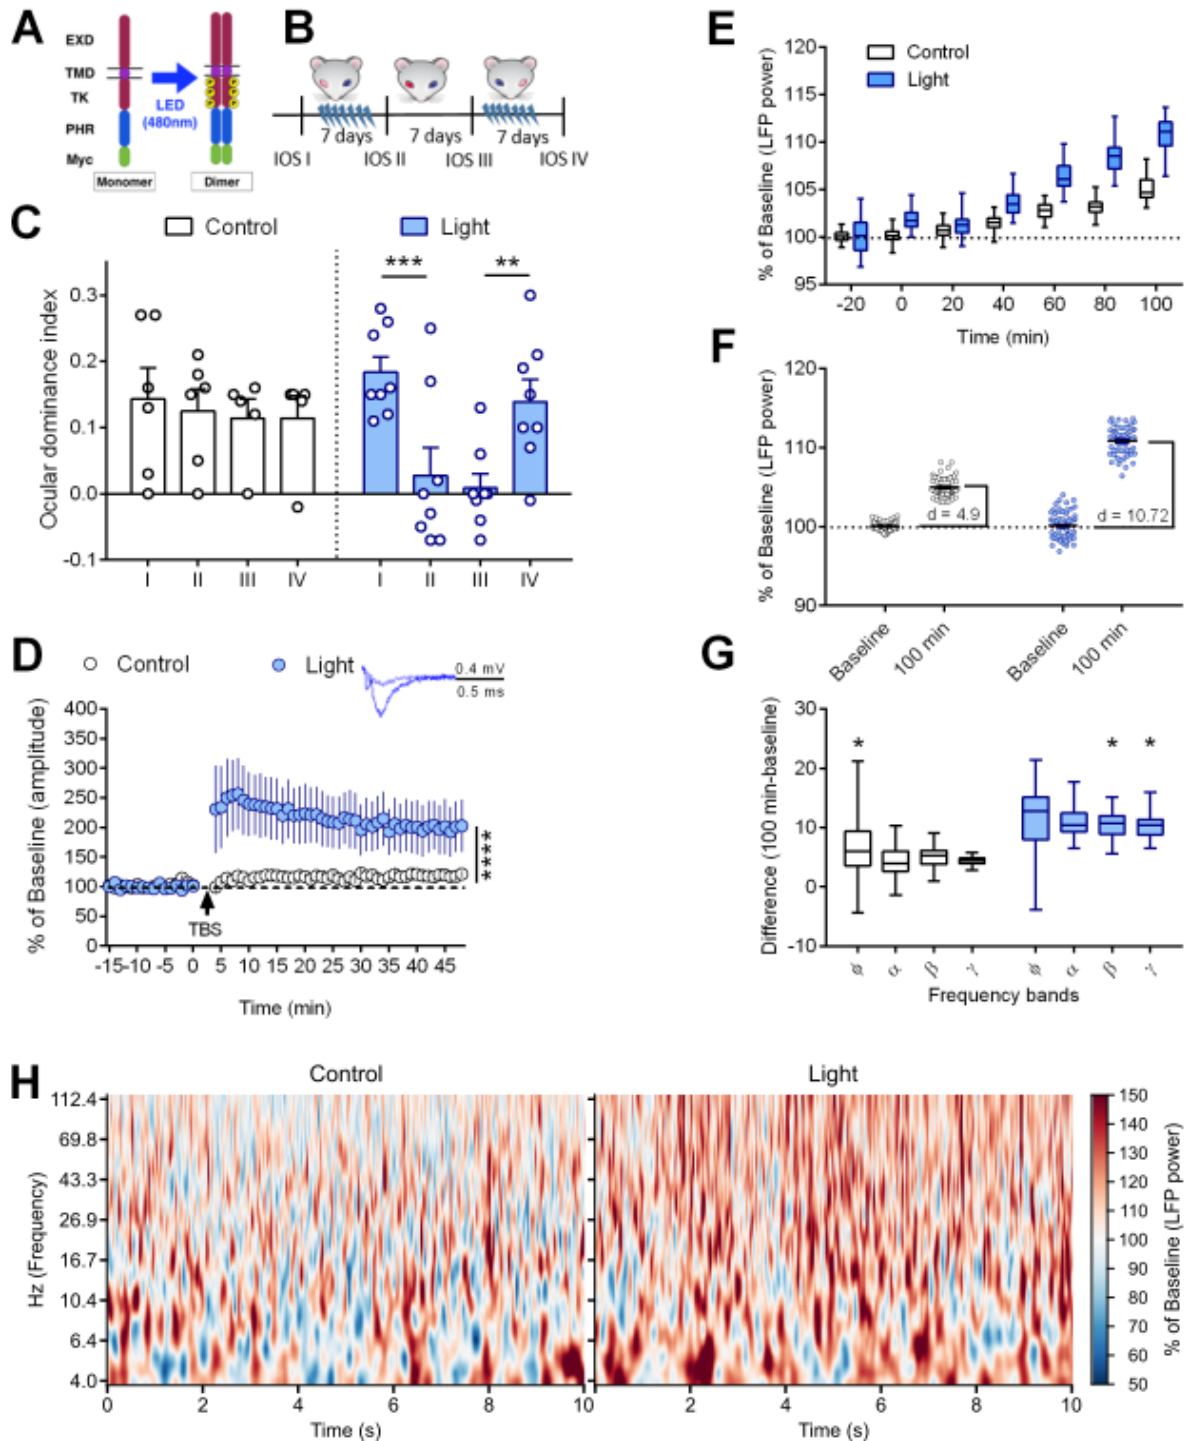

412

413 **Fig. 1. TrkB activation in PV interneurons induces visual cortex plasticity.**

414 (A) Structure of optoTrkB conjugated to a light reactive PHR domain, which dimerizes optoTrkB upon  
 415 blue light exposure. (B) Experimental timeline of the shift in ocular dominance paradigm with  
 416 optoTrkB. OptoTrkB was stimulated with blue light twice daily (30 seconds) for 7 days during MD. (C)

417 MD of the contralateral eye induces a shift in ocular dominance when combined with stimulation of  
418 optoTrkB (IOS I-II) (n = 6-8 animals/group). Two-way ANOVA with Sidak's post-hoc test comparing  
419 the ODI of IOS I and II (control, p = 0.9094; light, p = 0.001). The shift is preserved if the eyes are not  
420 deprived (IOS II-III). Two-way ANOVA with Sidak's post-hoc comparing the ODI of IOS II with III  
421 (control, p = 0.4985; light, p = 0.6915). Stimulation of optoTrkB reverses shift in ocular dominance  
422 when combined with MD of the ipsilateral eye (IOS III-IV) (n = 6-7 animals/group; one mouse  
423 excluded due to corneal infection). Two-way ANOVA with Sidak's post-hoc test comparing ODI of IOS  
424 III and IV (control, p = 0.9094; light, p = 0.001). (D) LTP recordings from layer II/III in the V1. Theta-  
425 burst stimulation (TBS) results in LTP in slices where optoTrkB has been activated for 30 seconds 30  
426 minutes prior to LTP induction, but not in control slices. Two-way ANOVA (p < 0.0001). n = 6-7  
427 recordings/group randomly recorded from 5 animals. (E) The broadband (4–112 Hz) LFP power (blue:  
428 optoTrkB activated at 470 nm, black: control wavelength at 780 nm) averaged over animals (light =  
429 5, control = 4) for each 20 minute recording session as a function of time after light stimulation. LFP  
430 power shows a significant increase over time (Regression analysis; Control:  $y = 0.04 [\%/min] * x [min] + 100.25$ ,  $R^2 = 0.7573$ ,  $p < 0.0001$ ; Light:  $y = 0.09 [\%/min] * x [min] + 101.01$ ,  $R^2 = 0.8240$ ,  $p < 0.0001$ ).  
431 + 100.25,  $R^2 = 0.7573$ ,  $p < 0.0001$ ; Light:  $y = 0.09 [\%/min] * x [min] + 101.01$ ,  $R^2 = 0.8240$ ,  $p < 0.0001$ ).  
432 (F) Broadband LFP power increase from baseline period (left plot of each half) to 100-minute after  
433 blue light (470nm) stimulation (right plot of each half) was approximately twice as strong after  
434 optoTrkB activation (blue, difference in medians: d = 10.72) than after stimulation with control  
435 wavelength (780nm) (black, difference in medians: d = 4.90). A Welch's t-test confirmed that the LFP  
436 power in the 100-minute condition bins after optoTrkB activation is higher than after control  
437 stimulation (Welch's t-test, t = 21.60, p < 0.0001). (G) Changes in frequency bands 100 min after light  
438 stimulation compared to baseline. (H) Wavelet spectra of control (left) and light stimulated (right)  
439 mice. Color scale. Flx, fluoxetine; ODI, ocular dominance index; MD, monocular deprivation; V1,  
440 primary visual cortex; PHR, photolyase homology region; EXD, extracellular domain; TMD,  
441 transmembrane domain; TK, tyrosine kinase domain. Bars represent means  $\pm$  SEM. \*\* p < 0.01\*\*\*  
442 p < 0.001; \*\*\*\* p < 0.0001; Bars represent means  $\pm$  SEM, \*\*\*\* p < 0.00001.

443  
444  
445  
446  
447  
448  
449  
450  
451  
452  
453  
454  
455  
456  
457

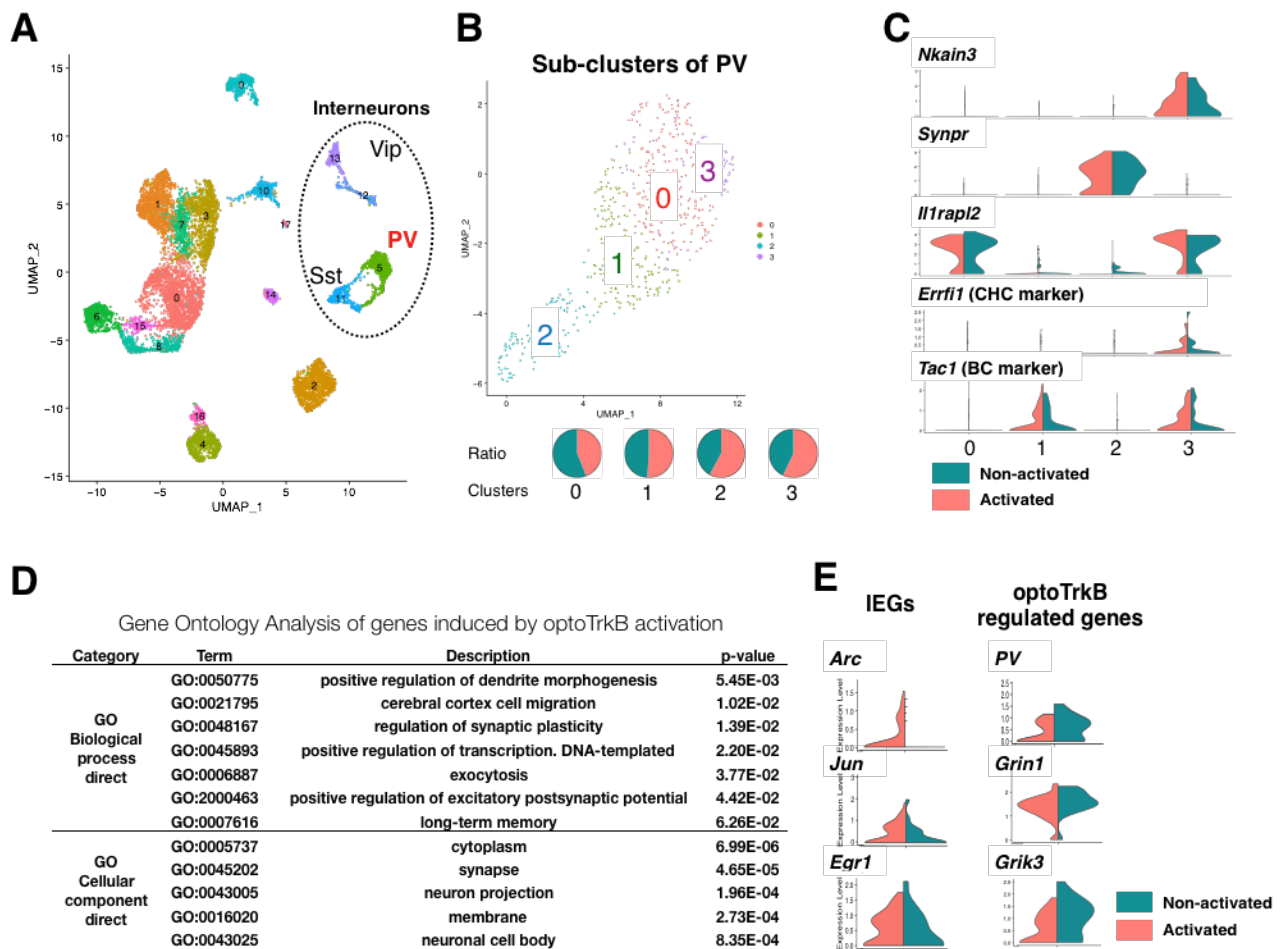

458  
459  
460  
461  
462  
463  
464  
465  
466  
467  
468  
469  
470  
471  
472

**Fig. 2. TrkB regulates plasticity-related genes in PV interneurons.**

(A) Two-dimensional Uniform Manifold Approximation and Projection (UMAP) plots based on 3,000 differentially expressed (DE) genes for 10,706 cells. After PCA analysis followed by clustering, the cells were grouped into 18 subpopulations including interneurons. (B) UMAP plots based on 3,000 DE genes for selected 586 cells clustered to PV interneurons. After PCA analysis, the cluster was further divided into 4 groups (PV\_0, 1, 2, 3). (C) Markers differently expressed in each cluster. PV\_3 cluster include both Chandelier (CHC) and basket (BS) cells. (D) Gene ontology (GO) analysis on differentially expressed (DE) genes between non-light-exposed and light-exposed samples in cluster 3\_3. (E) Selected DE genes of immediate early genes (IEGs) and relevant genes to decreased excitation in cluster PV\_3.

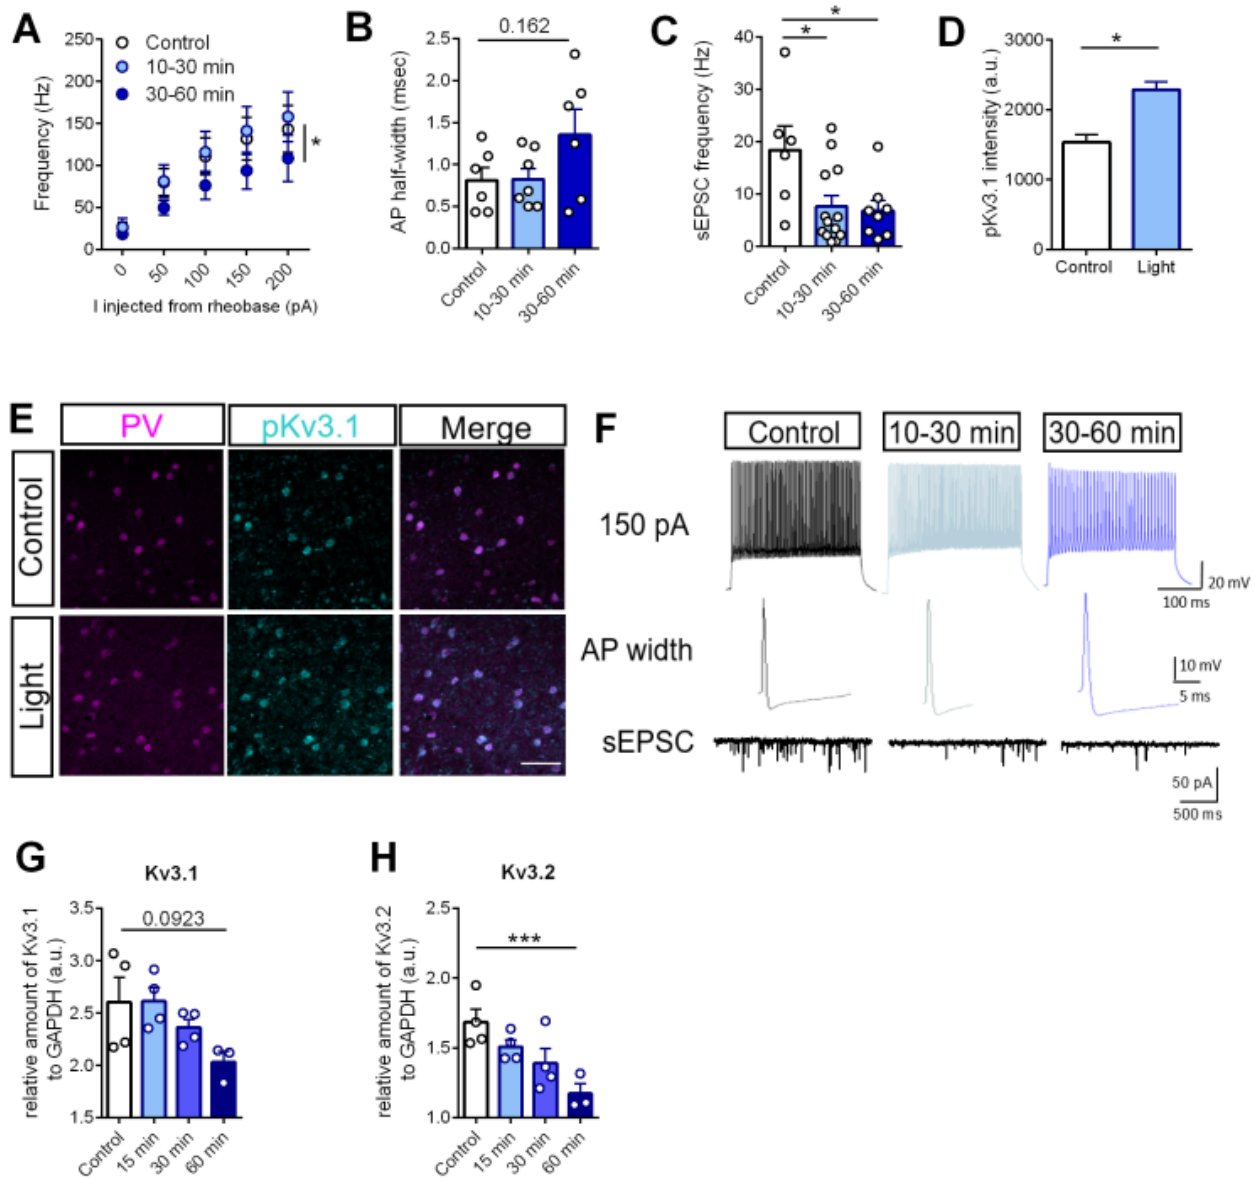

473

474

**Fig. 3. TrkB activation in PV interneurons reduces cell excitability.**

475

(A) Whole cell patch clamp recordings of intrinsic excitability of optoTrkB-transfected PV cells.

476

Activation of optoTrkB decreases intrinsic excitability of PV cells at 30-60 minutes after light

477

stimulation. Two-way ANOVA with Tukey's post-hoc test comparing control with light stimulation

478

(control vs. 30-60 min,  $p = 0.0354$ ).  $n = 6-8$  recordings/group randomly recorded from 14 animals.

479

(B) Trends towards larger AP half-width 30-60 min after light stimulation. One-way ANOVA with

480

Bonferroni's post-hoc test (30-60 min,  $p = 0.1622$ ). (C) sEPSC frequency in PV interneurons is lower

481

at 10-30 minutes after light stimulation as compared to controls. One-way ANOVA with Bonferroni's

482

post-hoc test (10-30 min,  $p = 0.0233$ ; 30-60 min,  $p = 0.0261$ ).  $n = 6-8$  recordings/group randomly

483

recorded from 14 animals. (D) Light stimulation of optoTrkB results in increased intensity of

484

phospho-Kv3.1 staining in PV interneurons in layer II/III of the V1. Unpaired t-test.  $n = 6$

485

animals/group; 7 days twice daily light stimulation. (E) Representative images of PV, phospho-Kv3.1

486

and merged immunohistochemistry staining. (F) Representative traces used to estimate intrinsic

487

excitability (top row, 150 pA), AP half-width (middle row) and sEPSC frequency (lower row). (G-H)

488

qPCR quantification of Kv3.1 and Kv3.2 mRNA. Kv3.1 ( $p = 0.0923$ ) (G) and Kv3.2 (H) mRNA levels are



489 decreased 60 min after light stimulation measured by qPCR. qPCR measurements of control, 15  
490 minutes, 30 minutes and 60 minutes after light stimulation. AP, action potential; spontaneous  
491 excitatory postsynaptic current, sEPSC; Bars represent means  $\pm$  SEM. \*  $p < 0.05$ ; \*\*\*  $p < 0.0001$ ; \*\*\*\*  
492  $p < 0.00001$

493  
494  
495  
496  
497  
498  
499  
500  
501  
502  
503  
504  
505  
506  
507  
508  
509  
510  
511  
512  
513  
514  
515  
516  
517  
518  
519

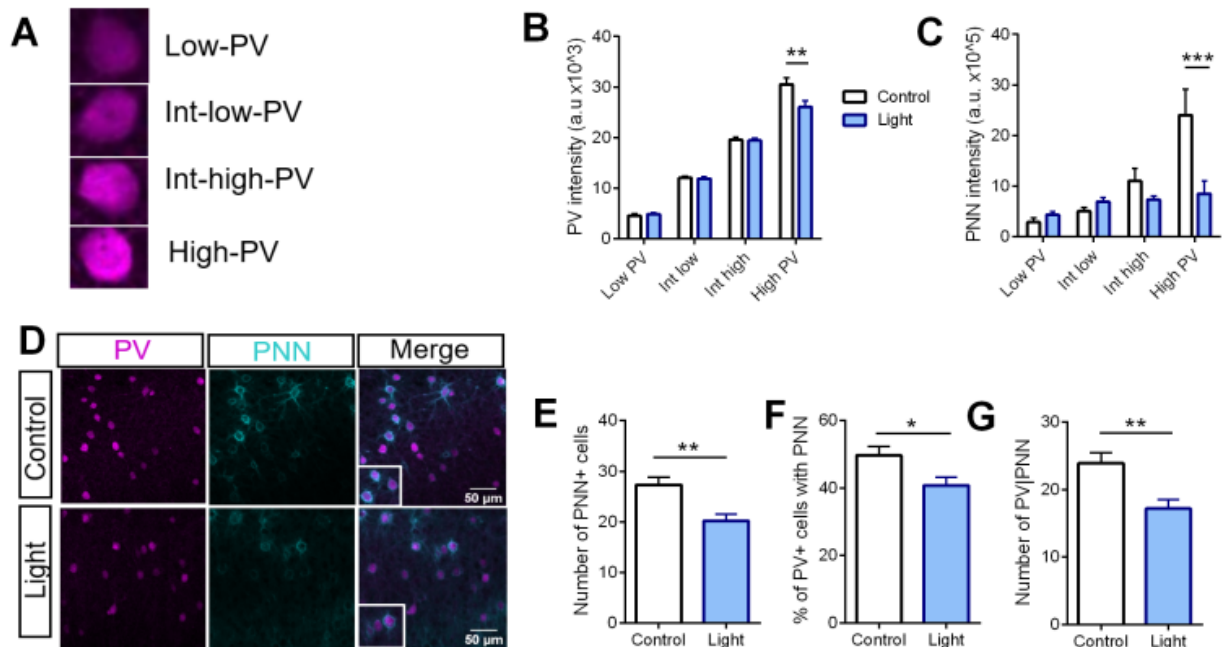

520  
521  
522  
523  
524  
525  
526  
527  
528  
529  
530  
531  
532  
533  
534  
535  
536  
537  
538  
539  
540

**Fig. 4. TrkB activation regulates PV-plasticity.**

(A) Representative immunohistochemical images of PV and PNN expression in layer II/III of the V1. (B-D) Number of cells expressing PV and/or PNN after optoTrkB activation (n = 6 animals/group). (B) Chronic light stimulation of optoTrkB significantly reduced numbers of PNN positive cells (Unpaired t-test; p 0.0012), (C) PV/PNN double-positive cells (Unpaired t-test; p = 0.0021), and (D) PV cells expressing PNN (Unpaired t-test; p = 0.0156). (E) Representative images of low, intermediate-low, intermediate-high and high PV-expressing cells, where PV interneurons are categorized according to PV intensity. (F) Image analysis on PV intensities. Chronic stimulation of optoTrkB significantly reduces the PV staining intensities of high PV expressing cells. Two-way ANOVA with Bonferroni's post-hoc test comparing control vs. light stimulated samples (p = 0.0034). (G) Image analysis on PNN intensities. Activation of optoTrkB decreases PNN intensities in high PV-expressing cells. Two-way ANOVA with Bonferroni's post-hoc test comparing control vs. light stimulated samples (p = 0.0003). Bars represent means ± SEM. \* p < 0.05; \*\*\* p < 0.0001; \*\*\*\* p < 0.00001

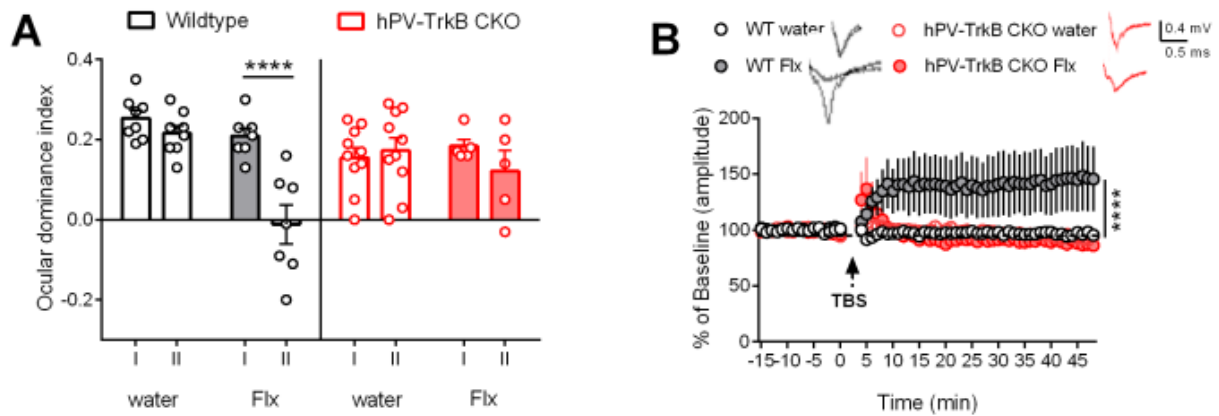

541

542

543

**Fig. 5. TrkB activation in PV interneurons is necessary for visual cortex plasticity**

544

(A) ODI after chronic Flx treatment in WT and hPV-TrkB CKO mice. Flx permits MD to shift the ODI towards the non-deprived eye in the V1 of WT mice, but fails to do so in hPV-TrkB CKO mice. Two-way ANOVA with Sidak's post-hoc test comparing the ODI of IOS I and II. WT water,  $p = 0.7311$ ; WT Flx  $p < 0.0001$ ; CKO water,  $p = 0.9621$ ; CKO Flx,  $p = 0.5048$ .  $n = 5 - 10$  animals/group. (B) LTP recordings from layer II/III in the V1 in WT and CKO mice after Flx treatment. TBS induces LTP only in WT mice treated with Flx. Two-way ANOVA with Tukey's post-hoc test comparing treatment in WT and treatment in CKO mice (WT water vs. WT Flx,  $p = < 0.0001$ ; CKO water vs. CKO Flx,  $p = 0.8871$ ).  $n = 7-12$  recordings/group from 3 animals.

552

553

554

555

556

557

558

559

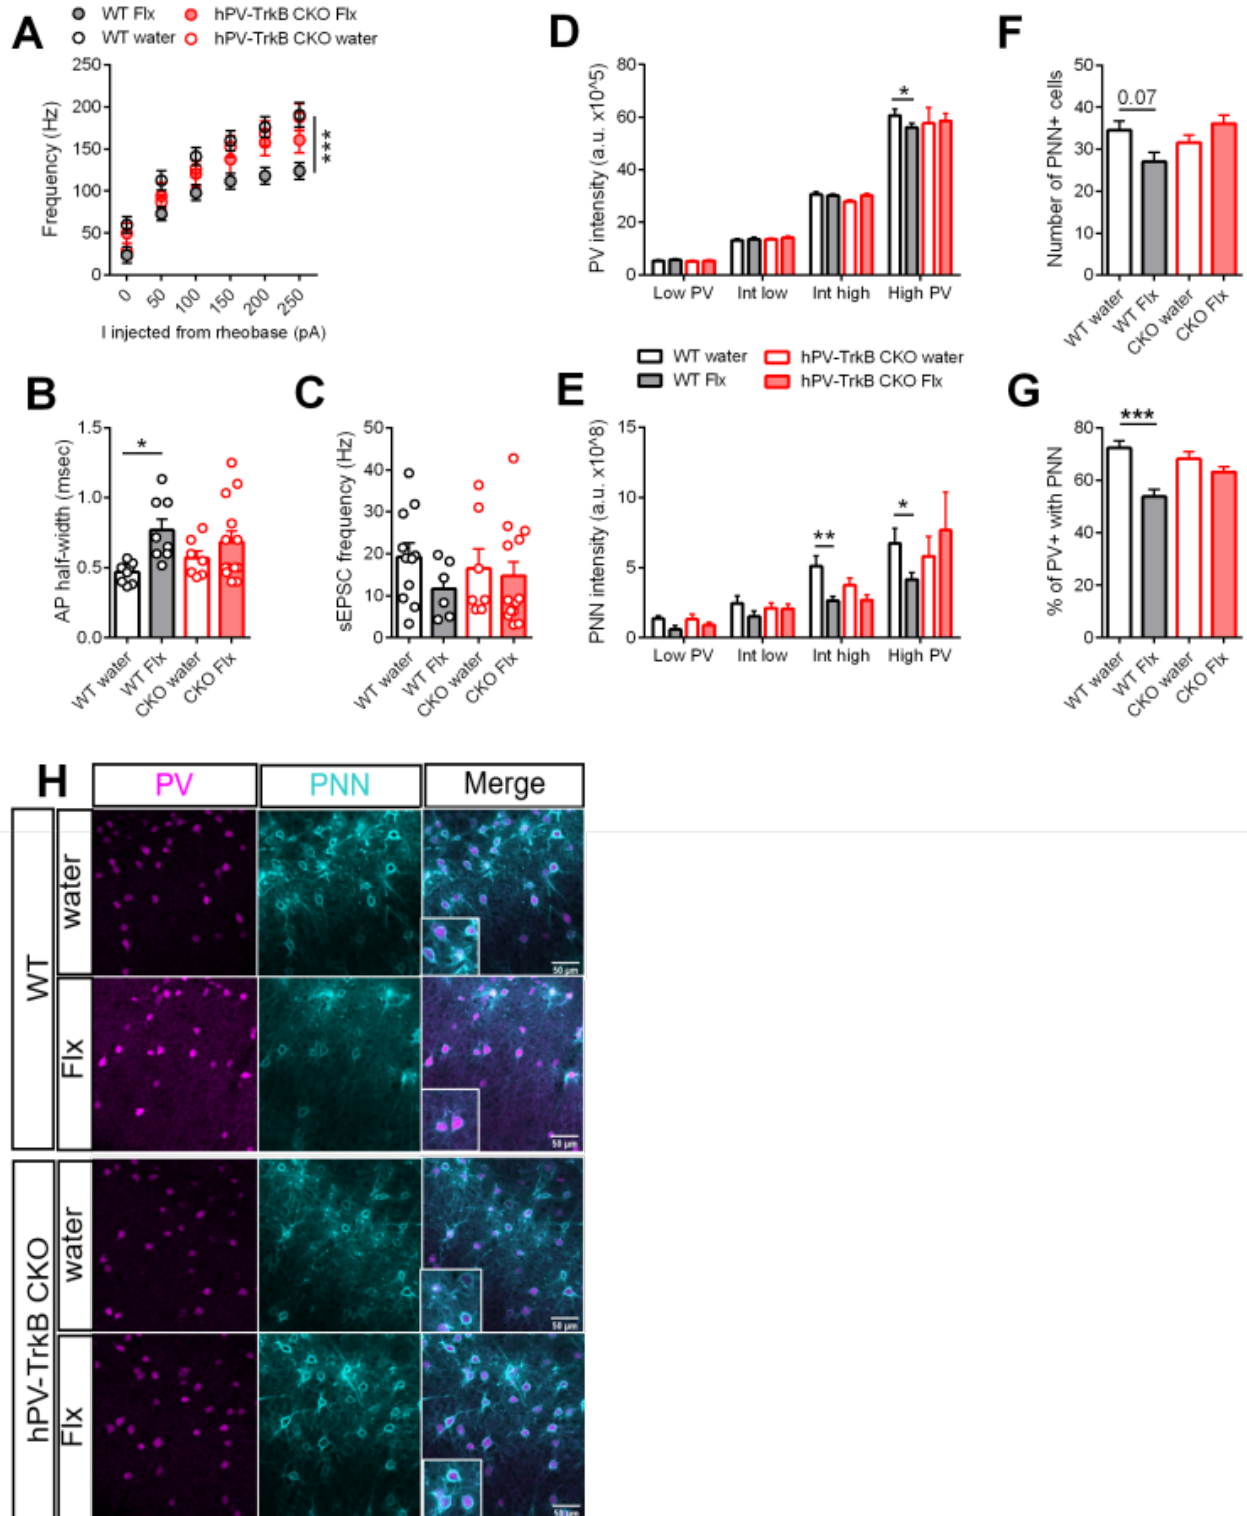

560  
561  
562  
563  
564  
565  
566  
567

568 **Fig. 6. TrkB expression is necessary for fluoxetine-induced changes in PV intrinsic properties**  
569 (A) Whole cell patch clamp analysis of WT and hPV-TrkB CKO mice after chronic Flx treatment. The  
570 intrinsic excitability is reduced after Flx treatment in WT mice but not in hPV-TrkB CKO mice. Two-  
571 way ANOVA with Tukey's post-hoc test comparing Flx treatment in WT and CKO mice (WT water vs.  
572 WT Flx,  $p < 0.0001$ ; CKO water vs. CKO Flx,  $p = 0.7068$ ).  $n = 7-12$  recordings/group from 3 animals.  
573 (B) Flx treatment increases AP half-width in WT mice but not in hPV-TrkB CKO mice. Two-way ANOVA  
574 with Tukey's post-hoc test comparing Flx treatment in WT and CKO mice (WT water vs. WT Flx,  $p =$   
575  $0.03$ ; CKO water vs. CKO Flx,  $p = 0.6672$ ). (C) Flx treatment induces a trend towards reduced  
576 frequency of sEPSC in WT ( $p = 0.5397$ ) but not in hPV-TrkB CKO mice ( $p = 0.9866$ ). Two-way ANOVA  
577 with Tukey's post-hoc test. (D) Flx treatment decreases PV intensities in high PV expressing cells in  
578 WT but this effect is not seen in hPV-TrkB CKO mice. Two-way ANOVA with Tukey's post-hoc test  
579 comparing Flx treatment in WT and hPV-TrkB CKO mice (WT water vs. WT Flx,  $p = 0.0325$ ; CKO water  
580 vs. CKO Flx,  $p = 0.9838$ ). (E) Flx treatment reduces PNN intensities in intermediate-high and high PV  
581 expressing cells only in WT mice but fails to do so in hPV-TrkB CKO mice. Two-way ANOVA with  
582 Tukey's post-hoc test comparing Flx treatment in WT and hPV-TrkB CKO mice (WT water vs. WT Flx,  
583 intermediate-high,  $p = 0.0014$ ; high PV,  $p = 0.0325$ ; CKO water vs. CKO Flx, intermediate-high,  $p =$   
584  $0.3217$ ; high PV,  $p = 0.6112$ ).  $n = 6-10$  animals/group. (F) Flx-treated WT mice show a trend towards  
585 lower numbers of PNN ( $p = 0.07$ ). (G) Flx-treated WT mice have significantly lower percentages of  
586 PV interneurons also expressing PNNs, but this effect is abolished in hPV-TrkB CKO mice. Two-way  
587 ANOVA with Tukey's post-hoc test comparing Flx treatment in WT and CKO mice (WT water vs. WT  
588 Flx,  $p = 0.0001$ ; CKO water vs. CKO Flx,  $p = 0.6462$ ). (H) Representative immunohistochemical images  
589 of PV and PNN expression in layer II/III of Flx-treated WT and hPV-TrkB CKO mice. Number (B, C) and  
590 intensity (D, E) of cells expressing PV and/or PNN by imaging analysis after Flx treatment. Bars  
591 represent means  $\pm$  SEM. \*\*  $p < 0.01$ ; \*\*\*  $p < 0.001$ ; \*\*\*\*  $p < 0.0001$   
592

593

594

595

596

597

598

599

600

601

602

603

## 604 **Material and Methods**

### 605 EXPERIMENTAL MODEL AND SUBJECT DETAILS

606 All animal procedures were done according to the guidelines of the National Institutes of Health  
607 Guide for the Care and Use of Laboratory Animals and were approved by the experimental Animal  
608 Ethical Committee of Southern Finland. Female mice (PV-cre, WT or hPV-TrkB CKO) older than 110  
609 days were group housed with *ad libitum* access to food and water. For the shift in ocular dominance  
610 paradigm, the mice underwent transparent skull surgery and were monocularly deprived for 7 days.

611

612

### 613 **Mice**

614 Heterozygous mice with TrkB deletion specifically in PV<sup>+</sup> interneurons (PV-hTrkB mice; PV<sup>pvr/wt</sup>,  
615 TrkB<sup>fix/wt</sup>) were produced by mating females of heterozygous PV specific Cre line (PV<sup>pvr/wt</sup>) (Pvalb-  
616 IRES-Cre, JAX: 008069, Jackson laboratory) (Hippenmeyer et al., 2005) and male of homozygous  
617 floxed TrkB mice (TrkB<sup>fix/fix</sup>) (Minichiello et al., 1999). Single floxed mice (TrkB<sup>fix/wt</sup>) served as control.  
618 For patch-clamp electrophysiology, females of the homozygous PV Cre line (PV<sup>pvr/pvr</sup>) were crossed  
619 with males harboring a homozygous TdTomato indicator allele (Rosa26<sup>TdT/TdT</sup>) (Ai14, JAX: 007914,  
620 Jackson laboratory, Bar Harbor, ME) (Madisen et al., 2010) and heterozygous floxed TrkB allele  
621 (TrkB<sup>fix/wt</sup>) (Minichiello et al., 1999) to reproduce compound transgenic mice with TrkB deletion and  
622 TdT expression specifically in PV interneurons (PV<sup>pvr/wt</sup>, TrkB<sup>fix/wt</sup>, Rosa26<sup>TdT/wt</sup>) (hPV-TrkB CKO) and  
623 wild-type allele in TrkB (PV<sup>pvr/wt</sup>, TrkB<sup>wt/wt</sup>, Rosa26<sup>TdT/wt</sup>) (WT). All of the parental strains were back-  
624 crossed with C57BL/6J for more than six generations. To assure the complete closure of the critical  
625 periods the mice were older than 110 days at the start of the experiments. The mice were kept  
626 under 12h light/dark cycle with light on at 6 am and *ad libitum* access to food and water.

627

## 628 Construction of optoTrkB

629 Photolyase homology region (PHR) domain of optoTrkB (Chang et al., 2014) was optimized in codon  
630 usage for mice and connected with a flexible tag (Kennedy et al., 2010) to the C-terminus of a full-  
631 length mouse TRKB, as previously described (Umemori et al, submitted). For cre-dependent  
632 expression of optoTrkB, a double floxed inverted open-reading frame (DIO) structure (Fenno et al.,  
633 2014) of optoTrkB (DIO-optoTrkB) was constructed (Figure S1A). We artificially synthesized DNA  
634 including human Synapsin promoter (Kügler et al., 2001), lox2272 (Lee & Saito, 1998), loxP, inverted  
635 optoTrkB sequence [PHR, flexible tag (Kennedy et al., 2010), mouse full-length TrkB  
636 (NM\_001025074)], lox2272, loxP, and cloned into pFCK(0.4)GW (a gift from Pavel Osten) (Addgene  
637 plasmid # 27229 ; <http://n2t.net/addgene:27229>; RRID:Addgene\_27229) (Dittgen et al., 2004) using  
638 PacI and EcoRI cloning sites (Figure S1a). Furthermore, for electrophysiological studies, we  
639 constructed DIO-optoTrkB expressing TdTomato (Shaner et al., 2004) (DIO-optoTrkB-IRES-TdT)  
640 (Figure S1C). A fragment of Internal ribosome entry site (IRES) with TdTomato was amplified by PCR  
641 with primers (5'- ggcgcgCCCCCTCTCCCTCCCCCCC -3' and 5'-  
642 ggcgcgccTTACTTGACAGCTCGTCCATGCCGTACAG -3') using Hot start Q5<sup>®</sup> polymerase (NEB,  
643 Frankfurt, Germany) from LeGO-iT (a gift from Boris Fehse) (Addgene plasmid # 27361 ;  
644 <http://n2t.net/addgene:27361> ; RRID:Addgene\_27361) (Weber et al., 2010), and cloned into pCR<sup>™</sup>  
645 Blunt II-TOPO<sup>®</sup> vector (ThermoFisher Scientific, Hvidovre, Denmark). Then the sequence was  
646 confirmed by sequencing and sub-cloning into Ascl cloning sites of DIO-optoTrkB (Figure S1A) to  
647 construct DIO-optoTrkB-IRES-TdT. Cre-dependent Inversions of DIO-optoTrkB and DIO-optoTrkB-  
648 IRES-TdT were confirmed in HEK293 cells co-transfected with the DIO-vectors and plasmids  
649 expressing Cre recombinase followed by PCR (Set1 (Figure S1B), and immunocytology (Figure S1D)).  
650 The following primers were used to confirm the inversion of DIO-optoTrkB:  
651 Set1 (5'- AGTCGTGTCGTGCCTGAGA -3' and 5'- GAAATTTATGTGCCGCAGGT -3'); Set2 (5'-

652 CTGCTGGCAAAGGCTATTTTC -3' and 5'- GGGCCACAACCTCCTCATAAA -3').

653

#### 654 Virus generation

655 DIO-optoTrkB/DIO-optoTrkB-IRES-TdT, pLP1, pLP2, and pVSVG were co-transfected into HEL293FT  
656 cells by jetPEI® (Polyplus Transfection, Illkirch, France) according to the manufacturer's instruction,  
657 for producing lentivirus through a previously reported method (Hioki et al., 2007). Briefly, 3µg of  
658 the plasmids was transfected into HEL293FT cells and cultured on a poly-D-Lysine coated dish  
659 containing pre-warmed Opti-MEM® medium (ThermoFisher Scientific) with 2% FBS for 72 hrs. Then  
660 the culture supernatant was collected and exchanged with a new Opti-MEM® medium with 2% FBS  
661 followed by incubation for 72 hrs. The culture supernatant was collected again and centrifuged at 4  
662 °C at 2000 g for 10 min. The supernatant was then concentrated with Amicon® Centrifugal Filter  
663 Units Ultra -15 (Merck Millipore, Darmstadt, Germany) into less than 10ml. The concentrated  
664 solution was purified using the sucrose gradient method (Tiscornia et al., 2006) and aliquots were  
665 stored at -80 °C until use. From one aliquot the p24 capsid protein concentration was measured to  
666 estimate the infection unit (IU).

667

#### 668 Virus injection

669 PV-cre mice were anaesthetized with 2.5% isoflurane and DIO-optoTrkB (p24 concentration/titer  
670  $4,04 \times 10^7$ ) was stereotaxically injected into the binocular area of the V1, previously identified  
671 through optical imaging (see below) and using blood vessels as landmarks. DIO-optoTrkB was  
672 stimulated with blue LED light (470nm) through the transparent skull during monocular deprivation  
673 twice a day for 30 seconds at 8-10 am and 4-6 pm. Blue LED light was provided by a BLS Super High  
674 Power Fiber-Coupled LED Light Sources (BLS-FCS-0470-100, Mightex, Pleasanton, CA) connected to  
675 a BioLED Light Source Control Modules (BLS-3000-2, Mightex). To avoid light exposure through the



676 skull, the transparent skull was covered by black nail polish between light stimulation sessions.ht

677

## 678 Surgery

679 For chronic imaging of intrinsic signals, the animals underwent transparent skull surgery as  
680 described previously (Steinzeig et al., 2017).

681

## 682 Fluoxetine treatment

683 Fluoxetine (Bosche Scientific, New Brunswick, NJ) was administered via drinking water (0.08 mg/ml),  
684 corresponding to a dose of approximately 8-12 mg/kg/day, and kept in light-protected bottles. The  
685 drinking water of both the control and fluoxetine group contained 0.1 % saccharin, was changed  
686 twice a week and the consumption was monitored. Drug treatment started after transparent skull  
687 surgery and continued throughout the whole experiment.

688

## 689 Monocular deprivation and virus stimulation

690 The animals were anaesthetized with intraperitoneal injection as described above. The eye lashes  
691 were trimmed and the eye lid margins were sutured shut with 3 mattress sutures. To prevent  
692 postoperative infections, an eye ointment containing dexamethasone was applied. The eyes were  
693 checked daily until reopening, re-sutured if needed, and mice with signs of corneal injury were  
694 excluded from the experiments.

695

## 696 Optical imaging of intrinsic signals

697 We determined the strength of neuronal responses to stimulation of either eye in the binocular  
698 region of the V1 using imaging of intrinsic signals (IOS) (Kalatsky & Stryker, 2003) before (IOS I; IOS

699 III) and after (IOS II; IOS IV) monocular deprivation. The animals were chamber anaesthetized with  
700 1.8% isoflurane in a 1:2 mixture of O<sub>2</sub>/air and then intubated and ventilated with 1.2% isoflurane in  
701 the same mixture.

702 Intrinsic optical signal responses were recorded from the V1 of the right hemisphere according to a  
703 previously described protocol (Kalatsky & Stryker, 2003), which was modified for the measurement  
704 of OD plasticity (Cang et al., 2005).

705

### 706 Data analysis of optical imaging

707 Cortical maps were computed based on the acquired frames using Fourier decomposition to extract  
708 the signal from biological noise using an analysis software package for continuous recording of  
709 optical intrinsic signals (VK Imaging, USA) (Kalatsky & Stryker, 2003). The ODI was then calculated  
710 for every pixel within the binocularly responding region based on the formula  $(C-I)/(C+I)$ , where “C”  
711 refers to the response magnitude of the contralateral eye and “I” to that of the ipsilateral eye. For  
712 each animal, several ODIs were collected and then averaged. Positive ODI values represent  
713 contralateral dominance, negative represent ipsilateral dominance, while ODI values of 0  
714 correspond to equally strong contralateral and ipsilateral eyes.

715

### 716 In vivo electrophysiology

717 To measure oscillations in the binocular region of the optoTrkB transfected area, PV-cre mice  
718 underwent transparent skull surgery and optoTrkB was injected as described above. Under 15%  
719 urethane anesthesia (in PBS), a hole for a 16 channel optrode (A1x16-10mm-100-177-OA16LP,  
720 NeuroNexus, Ann Arbor, MI) was drilled next to the injection site and a hole for a ground electrode  
721 next to lambda. The animals were head-fixed and the optrode was covered with Dil and slowly  
722 inserted into the V1 to a depth of about 2200  $\mu$ m. The data was recorded using a Smartbox

723 (NeuroNexus) at a sampling rate of 20 kHz. After collecting a 20 minute baseline, optoTrkB was  
724 stimulated for 30 seconds with blue LED light and recorded for 2h, separated into 20-minute blocks.  
725 Finally, the animals were transcardially perfused and the brains fixed with 4% PFA. To confirm the  
726 position of the electrodes and co-localization with optoTrkB, 250  $\mu$ m coronal slices were cut on a  
727 vibratome.

728 The digitized data were first offline notch filtered at 50 Hz by the Python RHD2000 interface provided  
729 by Intan. Afterwards, the data were band-pass filtered between 4 and 150 Hz, using a 2nd order  
730 Butterworth filter with zero-phase shift, and then downsampled to a sampling rate of 1 kHz to  
731 extract the local field potential (LFP) component. The LFP for each electrode contact was normalized  
732 to zero and the underlying current source density (CSD) was calculated as the second spatial  
733 derivative, using previously published methods (Voigt & Kral, 2019).

734 Time-frequency analysis of the CSD data was performed by wavelet filtering using 36 Morlet  
735 wavelets with a width parameter  $m = 6$  and with frequencies ranging from 4 to 112 Hz with log-  
736 constant scaling. For further analyses, the signal from all electrodes that were identified to reside in  
737 areas with optoTrkB expression by the histological analysis was averaged, and the data were binned  
738 into non-overlapping 20 seconds bins. Morlet power spectra were estimated by computing the  
739 averaged magnitude over all bins of the 20-minute recording period per condition. For statistical  
740 analysis, broadband power in the 20-minute baseline period and the 20-minute period beginning  
741 100 minutes after LED onset was compared using permutation testing. Surrogate data was generated  
742 by 1000 random permutations of condition labels and the effect size was measured using Cohen's  
743  $d$ . All data analyses and statistics were performed in Python (ver. 2.7) using SciPy (ver. 0.19.0), the  
744 NeuroDSP toolbox (ver. 2.0.1-dev)(Cole et al., 2019), and custom written scripts.

745

746 **Electrophysiology in acute slices**

747 The brains of optoTrkB-infected PV-cre mice were dissected in darkness using red light illumination,  
748 and kept in the dark throughout the whole experiment. The brains, including brains of fluoxetine-  
749 treated WT and hPV-TrkB cKO mice, were dissected and immersed in ice-cold dissection solution  
750 containing (in mM): 124 NaCl, 3 KCl, 1.25 NaH<sub>2</sub>PO<sub>4</sub>, 1 MgSO<sub>4</sub>, 26 NaHCO<sub>3</sub>, 15 D-glucose, 9 MgSO<sub>4</sub>  
751 and 0.5 CaCl<sub>2</sub>. The cerebellum and anterior part of the brain were removed and coronal 350µm brain  
752 slices of the V1 were cut on a vibratome (Leica Biosystems, Wetzlar, Germany). Slices were divided  
753 into two groups and allowed to recover for 30 min at 31-32°C in artificial cerebrospinal fluid (ACSF)  
754 containing (in mM): 124 NaCl, 3 KCl, 1.25 NaH<sub>2</sub>PO<sub>4</sub>, 1 MgSO<sub>4</sub>, 26 NaHCO<sub>3</sub>, 15 D-glucose, and 2 CaCl<sub>2</sub>  
755 and bubbled with 5% CO<sub>2</sub>/95% O<sub>2</sub>.

756 OptoTrkB-transfected slices in one of the groups were acutely stimulated for 30 seconds with blue  
757 light after transferring them to the recording chamber, whereas the transfected slices in the other  
758 group were kept in darkness.

759 Field excitatory postsynaptic currents (fEPSPs) were recorded in an interface chamber (32°C) with  
760 ACSF-filled glass microelectrodes (2-4 MΩ) positioned within layer II/III of the V1 using an Axopatch  
761 200B amplifier (Molecular devices, San Jose, CA). Electric stimulation (100 µsec duration) was  
762 delivered with a bipolar stimulation electrode placed at the border of the white matter (WM) and  
763 layer VI. Baseline synaptic responses were evoked every 20 seconds with a stimulation intensity that  
764 yielded a half-maximum response. After obtaining a 15 minute stable baseline, θ burst stimulation  
765 (TBS) (4 sweeps at 0.1 Hz, each sweep with 10 trains of 4 pulses at 100 Hz at 200 ms intervals) was  
766 delivered and field potentials in response to 0.05 Hz stimulation were recorded for additional 45  
767 minute. WinLTP (0.95b or 0.96, [www.winltp.com](http://www.winltp.com)) was used for data acquisition and analysis.

768

769 To measure intrinsic excitability, the brains of PV-cre mice transfected with the DIO-optoTrkB-IRES-

770 TdT lentivirus were dissected as described above but cut in a protective NMDG ACSF (Ting et al.,  
771 2014) containing (in mM): 92 NMDG, 2.5 KCl, 1.25 NaH<sub>2</sub>PO<sub>4</sub>, 30 NaHCO<sub>3</sub>, 20 HEPES, 25 glucose, 2  
772 thiourea, 5 Na-ascorbate, 3 Na-pyruvate, 0.5 CaCl<sub>2</sub>·4H<sub>2</sub>O and 10 MgSO<sub>4</sub>·7H<sub>2</sub>O, pH 7.3–7.4 The slices  
773 were allowed to recover at 32°C for 10 min, after which they were transferred to modified ACSF  
774 containing (mM): 92 NaCl, 2.5 KCl, 1.25 NaH<sub>2</sub>PO<sub>4</sub>, 30 NaHCO<sub>3</sub>, 20 HEPES, 25 glucose, 2 thiourea, 5  
775 Na-ascorbate, 3 Na-pyruvate, 2 CaCl<sub>2</sub>·4H<sub>2</sub>O and 2 MgSO<sub>4</sub>·7H<sub>2</sub>O , pH 7.3-7.4 for storage. Recordings  
776 were done in submerged chamber perfused with normal ACSF (32°C).

777 Whole cell patch clamp recordings from the TdT expressing PV cells were obtained under visual  
778 guidance under ambient light with glass microelectrodes (3-5 MΩ) filled with a low Cl<sup>-</sup>-filling solution  
779 containing (in mM): 135 K-gluconate, 10 HEPES, 2 KCl, 2, Ca(OH)<sub>2</sub>, 5 EGTA, 4 Mg-ATP, 0.5 Na-GTP  
780 using a Multiclamp 700A amplifier (Axon Instruments, Foster City, CA). Uncompensated series  
781 resistance (Rs) was monitored by measuring the peak amplitude of the current response to a 5 mV  
782 step. Only experiments where Rs < 30 MΩ, and with < 20 % change in Rs during the experiment,  
783 were included in analysis.

784 Intrinsic excitability was measured in current clamp mode by injecting currents ranging from -50 to  
785 600 pA for 600 ms in 50 pA steps from the resting membrane potential of -60/-70 mV. The recordings  
786 were analyzed in Clampfit (Molecular Devices, San Jose, CA) programs. A minimum of three action  
787 potentials (AP) were averaged based on their AP half-width (10<sup>th</sup> AP at 200pA injected from  
788 rheobase). sEPSCs were recorded under voltage clamp at -70 mV and analyzed in Clampfit  
789 (Molecular Devices). The threshold for detection of inward sEPSC events was three times the  
790 baseline noise level, and all detected events were verified visually.

791

## 792 Sample collection

793 For collecting tissue samples for qPCR and Western Blot experiments, the brains of optoTrkB infected  
794 PV-cre mice were dissected and immersed in ice-cold dissection solution containing (in mM): 124  
795 NaCl, 3 KCl, 1.25 NaH<sub>2</sub>PO<sub>4</sub>, 1 MgSO<sub>4</sub>, 26 NaHCO<sub>3</sub>, 15 D-glucose, 9 MgSO<sub>4</sub> and 0.5 CaCl<sub>2</sub>. The V1 was  
796 dissected and incubated at 31-32°C in artificial cerebrospinal fluid (ACSF) containing (in mM): 124  
797 NaCl, 3 KCl, 1.25 NaH<sub>2</sub>PO<sub>4</sub>, 1 MgSO<sub>4</sub>, 26 NaHCO<sub>3</sub>, 15 D-glucose, and 2 CaCl<sub>2</sub> and bubbled with 5%  
798 CO<sub>2</sub>/95% O<sub>2</sub>. The tissue samples were either immediately collected in NP lysis buffer and  
799 homogenized (control), or stimulated with blue LED light for 30 seconds and collected and  
800 homogenized after 15 minutes, 30 minutes or 60 minutes. All of the procedures were done in dark  
801 conditions. The samples were further used for qPCR and Western Blot analysis.

802

## 803 Western Blot

804 The samples were centrifuged (16000 g, 15 min at +4°C) and the supernatant was used to measure  
805 the protein concentrations using the Lowry method (Biorad DC protein assay, Bio-Rad, Richmond,  
806 CA) (Lowry et al, 1951). The samples were separated in a SDS-PAGE (2-4% gradient gel, NuPage™;  
807 ThermoFisher Scientific) and blotted to a PVDF membrane (300 mA, 1 h, + 41°C). The membranes  
808 were washed in Tris Buffer Solution with 0,001% Tween<sup>®</sup>20 (TBST), blocked in TBST with 3% BSA for  
809 1 hour at room temperature and incubated in primary antibody solutions (in TBST with 3% BSA)  
810 directed against: phosphorylated (pY816, #4168, 1:1000; pY515, #9141, 1:1000; pY706-7, #4621S,  
811 1:1000, Cell signaling technology (CST), Danvers, MA) and non-phosphorylated forms of TrkB and  
812 CREB (TrkB, 1:2000, BD Transduction Laboratories, San Jose, CA; CREB, #4820S, CST, Danvers, MA) at  
813 +4°C for overnight. After washing in TBST, the membranes were further incubated in secondary  
814 antibody solutions (TBST with 5% Non-Fat Dry Skinned Milk and Horseradish Peroxidase conjugated

815 secondary antibodies Goat Anti-Rabbit/Mouse, 1:10000, Bio-Rad) for 2 hours at room temperature.  
816 After washing with TBST and rinsing with PBS, secondary antibodies were visualized by an  
817 electrochemiluminescence kit (ECL plus, ThermoFisher Scientific) according to the manufactures  
818 instruction, and detected using a FUJIFILM LAS-3000 dark box.

819

## 820 qPCR

821 RNA was purified from the lysate following the manufacturer's protocol using a combined protocol  
822 of QIAzol® (Qiagen, Hilden, Germany) and NucleoSpin® (Macherey-Nagel, Düren, Germany). Briefly,  
823 the aqua layer was isolated after Qiazol and chloroform extraction. The RNA was washed in 100%  
824 ethanol and the DNA was digested in the spin columns. The purified RNA was then reverse  
825 transcribed to cDNA using Maxima First Strand cDNA Synthesis Kit (ThermoFisher Scientific). The  
826 amount of cDNA synthesized from the target mRNA was quantified by real-time PCR (qPCR). The  
827 following primers were used to amplify specific cDNA regions of the transcripts of interest:

828 Kv3.1 (5' -AGAGATTGGCACTCAGTGACT-3' and 5' -TTGTTACGATGGGGTTGAAG-3' ), Kv3.2 (5'  
829 -AGGCTATGGGGATATGTACCC-3' and 5' -TGCAAAATGTAGGCGAGCTTG-3' ), PV (5'-  
830 TGTCGATGACAGACGTGCTC-3' and 5'-TTCTTCAACCCCAATCTTGC-3').

831

## 832 Immunohistochemistry

833 Animals were transcardially perfused with PBS followed by chilled 4% paraformaldehyde (PFA) in  
834 PBS. Brains were removed under ambient light and left for fixation in 4% PFA overnight at +4 °C. For  
835 cutting, the brains were embedded in 3% agar and cut into 40 µm coronal visual cortical sections  
836 using a vibratome (Leica Biosystems, Wetzlar, Germany). After washing with PBST (1x PBS and 0.2%  
837 TritonX100), the sections were incubated in 10% donkey serum (Vector Laboratories, Peterborough,

838 UK) and 3% Bovine Serum Albumin (BSA) (Sigma-Aldrich, Steinheim, Germany) in PBST for 30  
839 minutes at room temperature. Next, the sections were incubated with the following antibodies: 1)  
840 guinea pig anti-parvalbumin (1:1000) (#195004, Synaptic Systems, Göttingen, Germany), 2)  
841 biotinylated lectin from Wisteria floribunda (WFA; 1:200) (#L1516-2MG, Sigma-Aldrich), and 3)  
842 rabbit anti-phospho Kv3.1 (1:100) (#75-041, Phosphosolutions, Aurora, CO) overnight at +4° C. After  
843 washing in PBST, the samples were further incubated in: 1) goat anti-guinea pig secondary antibody  
844 conjugated with Alexa Fluor647/546 (1:1000) (Abcam, Cambridge, UK), 2) streptavidin conjugated  
845 with Alexa Fluor488 (1:1000) (Thermofisher Science), or 3) Goat anti-rabbit conjugated with Alexa  
846 Fluor 647 (1:1000) (Life technologies, Carlsbad, CA) for 2 hours at room temperature protected from  
847 light. After final washing in PBS, the sections were transferred to 0.1M PB with gelatin, mounted on  
848 glass slides and covered with DAKO mounting medium (Sigma Aldrich).

849

#### 850 Image acquisition and analysis

851 Quantitative analysis of immunostainings was performed blind. Images were taken from the V1  
852 according to the mouse brain atlas.

853 Laser scanning confocal microscopy was used to detect PV positive (PV<sup>+</sup>), PNN positive (PNN<sup>+</sup>),  
854 double positive (PV<sup>+</sup>PNN<sup>+</sup>) and pKv3.1-positive cells. Images were obtained using a confocal  
855 microscope LSM 700 (Carl Zeiss, Vantaa, Finland) equipped with a 10× objective lens (10x Plan-  
856 Apochromat 10x/0.45, Carl Zeiss) and imaging Software ZEN 2012 lite (Carl Zeiss). From each section,  
857 a z-stack containing at least 10 consecutive images was obtained. A minimum number of 3 sections  
858 per animal were imaged using the same microscope and the same camera settings for all samples.  
859 Image processing was done using ImageJ software version 1 (Schneider et al., 2012). All images in  
860 each z-stack were analyzed and the number of cells was averaged per z-stack.

861 To determine the PV cell populations, frequency distribution analyses were performed on PV



862 intensities taken from non-stimulated optoTrkB samples or control WT samples to serve as reference  
863 group. The PV cell populations were defined as low PV (0-8000 a.u.), intermediate-low PV (int-low  
864 PV, 8000-16000 a.u.), intermediate-high PV (int-high, 16000-24000 a.u.) and high PV (24000-36000  
865 a.u.) expressing cells and these criteria were applied to the light stimulated samples.

866

## 867 Nuclei preparation

868 Single nuclei RNA sequencing (snRNA-seq) was conducted by following previously reported methods  
869 with some modifications (Bakken et al., 2018; Krishnaswami et al., 2016) (Figure S3A). Considering  
870 that optoTrkB is sensitive to light stimulation, we used snRNA-seq instead of single cell RNA  
871 sequencing (scRNA-seq) after FACS selected by TdTomato fluorescence, to avoid laser-induced  
872 optoTrkB activation during FACS. There is a good correlation of gene expression and gene detection  
873 sensitivity in each cell between SnRNA-seq and scRNA-seq (Bakken et al., 2018), and snRNA-seq has  
874 several advantages, such as reduced dissociation bias and dissociation-induced transcriptional stress  
875 responses (Wu et al., 2019). Tissue samples were obtained bilaterally from the visual cortex of adult  
876 female PV-cre mice infected with DIO-optoTrkB-TdT. After deep anesthesia with pentobarbital, the  
877 mice were perfused with ice-cold NMDG ACSF (Ting et al., 2014) consisted of 0.5 mM CaCl<sub>2</sub>, 25mM  
878 D-Glucose, 98 mM HCl, 20 mM HEPES, 10 mM MgSO<sub>4</sub>, 1.25 mM NaH<sub>2</sub>PO<sub>4</sub>, 3 mM Myo-inositol, 12  
879 mM N-acetylcysteine, 96 mM N-methyl-D-glucamine, 2.5 mM KCl, 25 mM NaHCO<sub>3</sub>, 5 mM sodium L-  
880 Ascorbate, 3 mM sodium pyruvate, 0.01 mM Taurine, and 2 mM Thiourea, bubbled with a carbogen  
881 gas (95% O<sub>2</sub> and 5% CO<sub>2</sub>), and the brains were isolated and sliced on a vibratome (MICROM, HM  
882 650V, Thermofisher Science) in NMDG ACSF (Ting et al., 2014). Then, the slices were exposed to blue  
883 LED light (30 seconds), and incubated in a modified HEPES ACSF including 92 mM NaCl, 2.5 mM KCl,  
884 1.25 mM NaH<sub>2</sub>PO<sub>4</sub>, 30 mM NaHCO<sub>3</sub>, 20 mM HEPES, 25 mM glucose, 2 mM thiourea, 5 mM Na-  
885 ascorbate, 3 mM Na-pyruvate, 2 mM CaCl<sub>2</sub>, 2 mM MgSO<sub>4</sub>, 3 mM Myo-inositol, and 0.01 mM Taurine

886 for one hour. The visual cortex was bilaterally isolated from the slices under a microscope using red  
887 light illumination, and tissues were transferred to pre-cooled Dounce homogenizers filled with cold  
888 homogenization buffer (250 mM sucrose, 25 mM KCl, 5 mM MgCl<sub>2</sub>, 10 mM Tris buffer, pH 8.0, 1 μM  
889 DTT, 1× protease inhibitor (cOmplete, Sigma-aldrich), 0.4 U/μl RNase Inhibitor (Promega), 0.2 U/μl  
890 Superasin (Thermofisher Science, Waltham, MA), 0.1% (v/v) Triton X-100 (Sigma-Aldrich), 10 μg/ml  
891 Cyclohexamide (Sigma-Aldrich), 10 μg/ml Actinomycin D (Sigma-Aldrich), 10 ng/ml Hoechst 33342  
892 (Thermofisher Science)). The tissues were homogenized with five strokes of the loose pestle,  
893 followed by 10 strokes of the tight pestle. Finally, nuclei of the tissues were obtained by filtration  
894 through a BD Falcon™ cell strainers (BD Falcon, San Jose, CA). All procedures were performed with  
895 RNase free in the dark condition.

896

#### 897 Immunostaining and sorting of nuclei

898 The nuclei were centrifuged (1,000 x g, 8 min, 4 °C) and resuspended in staining buffer (PBS, pH 7.4,  
899 with 0.5% RNase-free BSA (Promega, Heidelberg, Germany) and 0.2 U/μl of RNasin Plus RNase  
900 inhibitor (Promega)). Samples were incubated in blocking/washing buffer (PBS with 0.5% BSA). The  
901 nuclei were incubated with mouse monoclonal anti-NeuN antibody (1:5000) (MAB377, Sigma-  
902 Aldrich) or purified mouse IgG1k (1:5000) (554121, BD Pharmigen, San Diego, CA) as a negative  
903 control for staining and sorting for 30 min with rotation at 4 °C. Then the samples were washed in  
904 staining buffer by inverting the tubes several times, and were centrifuged for 5 min at 400g at 4 °C.  
905 The pellet nuclei were re-suspended in 500 μl of staining buffer containing goat anti-mouse Alexa  
906 Fluor 488 secondary antibody (Thermofisher Science) with a final dilution of 1:5000, and were  
907 incubated with rotation for 30 min at 4 °C followed by washing with blocking/washing buffer.

908

909 **FACS of nuclei**

910 Hoechst 33342 and NeuN positive nuclei stained with Alexa488 were sorted and collected by BD  
911 Influx cell sorter (BD Biosciences, Heidelberg, Germany) (Figure S3B). After checking the quality,  
912 collected nuclei were loaded on Chromium Controller (10x Genomics).

913

914 **Single nuclei RNA sequencing (snRNA-seq)**

915 Preparation of cDNA Library was done using Chromium Single Cell 3' Gene Expression v3 library  
916 preparation kit (10x Genomics), and sequenced with NovaSeq 6000 (Illumina, San Diego, CA) with  
917 read lengths: 28bp (Read 1), 8bp (i7 Index), 0 bp (i5 Index) and 89bp (Read 2). Data was pre-  
918 processed using CellRanger 3.0. The reads are mapped to reference genome that included introns,  
919 and we obtained 3,789 and 6,923 cells with approximately 10k median reads per cell (Figure S4).

920

921 **Data analysis for snRNA-seq**

922 Data analysis was carried out using Chipster version 3.16 (Kallio et al., 2011), which utilizes Seurat  
923 v3 (Butler et al., 2018). Cells with more than 7,000 and less than 100 reads were filtered out, and  
924 reads for the remaining cells were scaled logarithmically. Based on results for plotting variance  
925 against expression, 3000 most highly varied genes in 10,706 cells were used for clustering and  
926 sample integration. By Seurat's integrated analysis (Butler et al., 2018), 20 canonical components  
927 were used for finding anchors and 20 principal components to integrate the samples together.  
928 Clusters were obtained using UMAP (McInnes et al., 2018) with 20 principal components and  
929 resolution 0.5 (Figure S5A, and S5B). This resulted in 18 clusters and we identified the clusters of  
930 pyramidal neurons and interneurons with previously reported markers (Tasic et al., 2018), such as  
931 *Glutamate decarboxylase 1 (Gad1)*, and those of interneurons with *Solute Carrier Family 6 Member*  
932 *1 (Slc6a1)*, *Parvalbumin (Pvalb)*, *Paired box protein (Pax6)*, *Vasoactive intestinal peptide (VIP)*, and

933 *Somatostatin* (*Sst*) (Fig. 2A) (Figure S5C). Then a subset of data containing only parvalbumin-positive  
934 interneurons was selected and clustered again by UMAP with the same parameters resulting in four  
935 different clusters (Fig. 2B) (Figure S6A and S6B). Markers and differentially expressed genes between  
936 non- and light- exposed samples were detected in each cluster (Figure S6D) (Table S3-6). Pathway  
937 and gene ontology analysis was carried out with DAVID (Huang et al., 2009).

938

### 939 Statistical analysis

940 All statistical graphs were generated using Graphpad Prism v.6.07 (GraphPad Software, San Diego,  
941 CA). Unpaired t-Test, Two-way and one-way ANOVA followed by Tukey's or Bonferroni post hoc tests  
942 were also performed using Graphpad Prism v.6.07. The confidence level was set to 0.05 (P value)  
943 and all results were presented as means  $\pm$  s.e.m. All the individual data points are shown in the  
944 histograms. The data distribution was assumed to be normal but this was not formally tested. The  
945 sample size was determined based on our previous experience.

946

### 947 DATA AND SOFTWARE AVAILABILITY

948 snRNA-seq data have been deposited in NCBI's Gene Expression Omnibus (Edgar et al., 2002) and  
949 are accessible through GEO Series accession number GSE 142797  
950 (<https://www.ncbi.nlm.nih.gov/geo/query/acc.cgi?acc=GSE142797>). Other raw data is available in  
951 Mendeley Data, V1, doi: 10.17632/992cg2vrj5.1  
952 (<https://data.mendeley.com/datasets/992cg2vrj5/draft?a=ab1dd775-63b5-4eca-aa01-0a565fb6fa0d>).

954

955

956

957

958

959 Supplemental Information

960

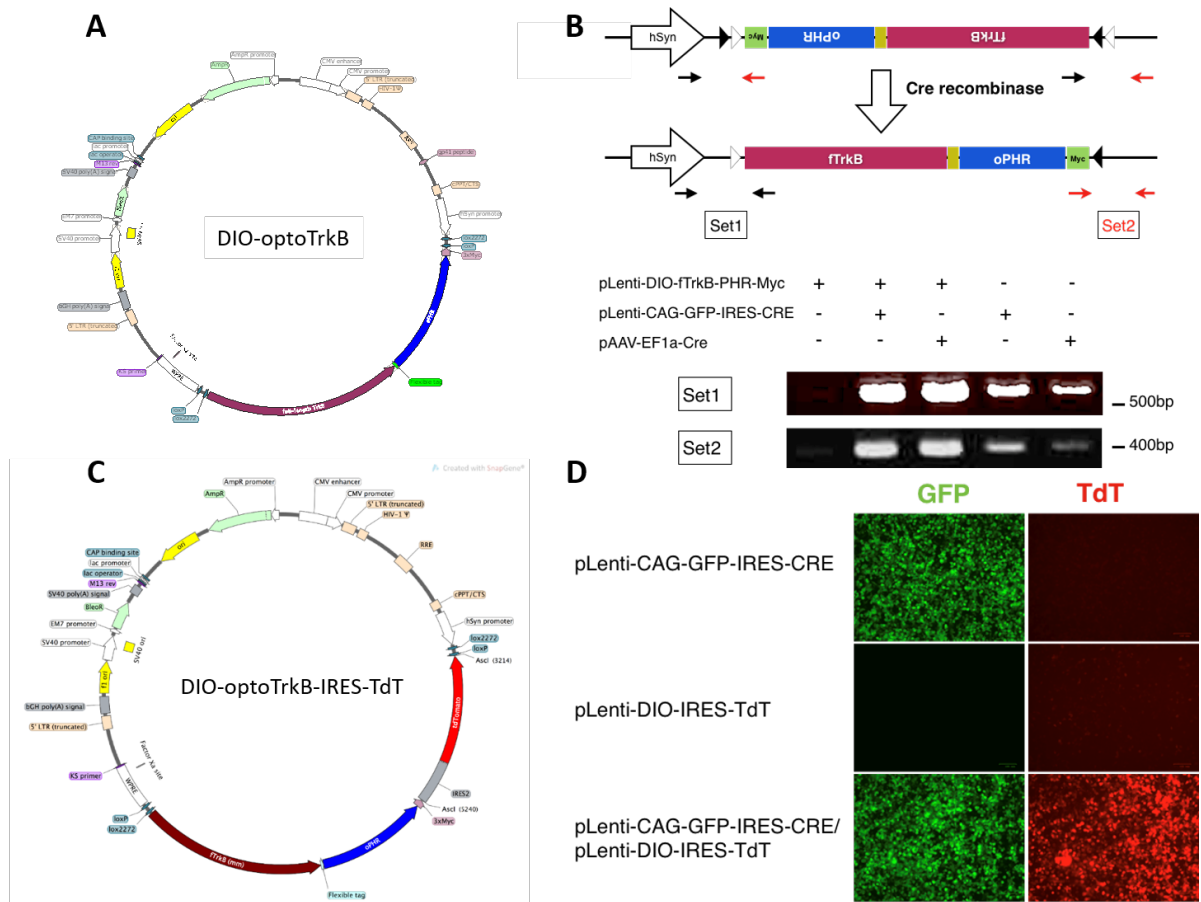

961

962 **Figure S1. Confirmation of inversion of DIO-optoTrkB by cre-recombinase**

963 (A) The plasmid producing lentivirus DIO-optoTrkB. (B) Confirmation of inversion of DIO-optoTrkB by  
 964 cre-recombinase. HEK293 cells were co-transfected with pLenti-DIO-optoTrkB and pLenti-CAG-GFP-IRES-CRE or  
 965 pAAV-EF1a-Cre, which express cre-recombinase. PCR analysis revealed that DIO-optoTrkB was inverted after  
 966 co-transfection with cre but not when expressed alone. (C) The plasmid producing DIO-optoTrkB-IRES-TdTomato.  
 967 (D) Confirmation of inversion of DIO-optoTrkB-IRES-TdTomato by cre-recombinase. HEK293 cells were transfected  
 968 with either or both pLenti-CAG-GFP-IRES-CRE and pLenti-optoTrkB-IRES-TdTomato. Only co-transfected cells  
 969 expressed TdTomato demonstrating that the expression is cre-dependent. hSyn, human Synapsin promoter; oPHR,  
 970 optimised Photolyase homology region; fTrkB, full-length TrkB.  
 971  
 972

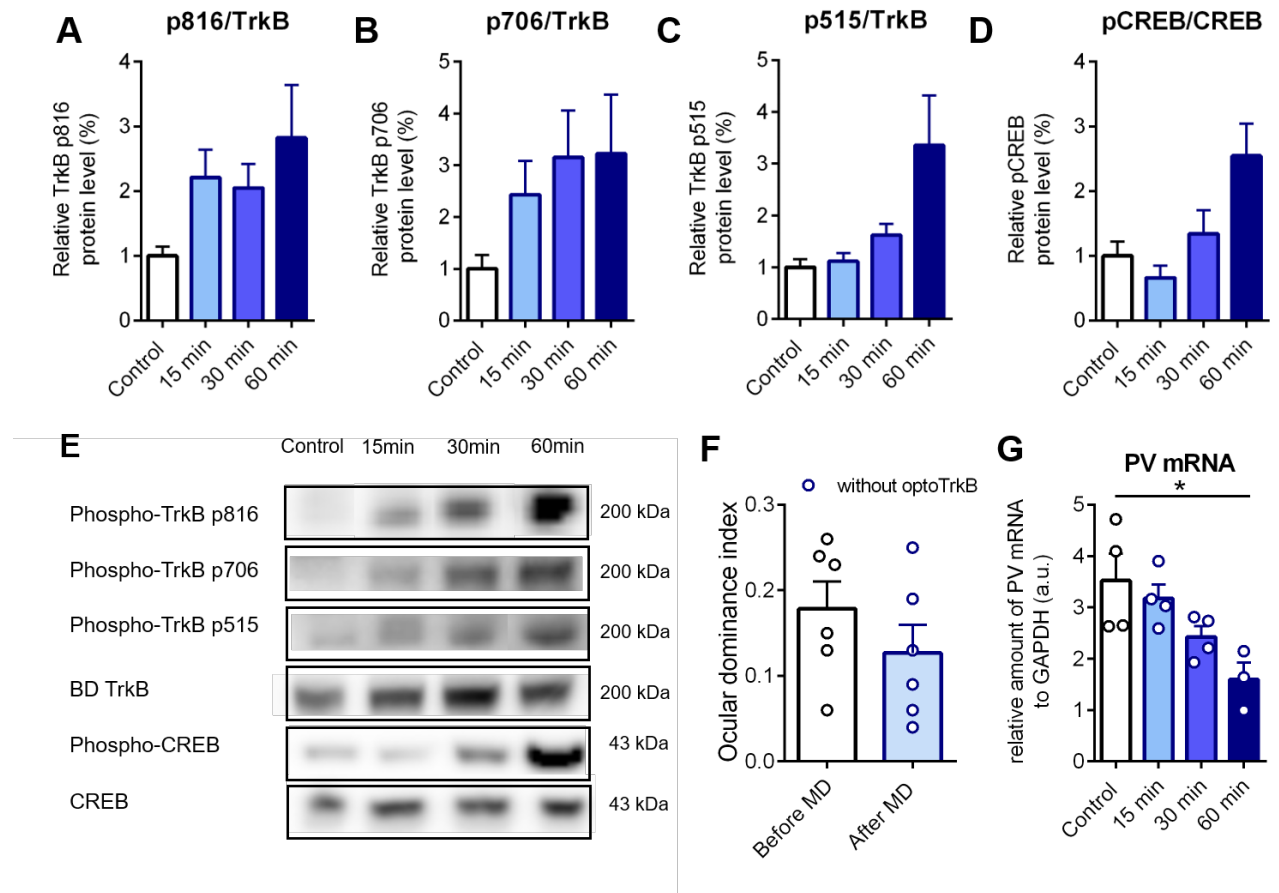

973

974 **Figure S2. OptoTroB activation mediates plasticity in the visual cortex.**

975 (A-E) Western Blot analysis of V1 of PV-cre mice infected with DIO-optoTrkB without light stimulation  
 976 (Control) and 15 minutes, 30 minutes and 60 minutes after light stimulation. Acute stimulation of  
 977 optoTrkB with light results in increased phosphorylation of tyrosine sites: (A) Y816, (B) Y515, (C) Y706  
 978 and (D) phosphorylation of CREB. (E) Representative Western Blots of Y816, Y515, Y706 and CREB.  
 979 (F) PV-cre mice without optoTrkB expression stimulated with blue light twice daily during 7 days of  
 980 MD show no shift in ocular dominance. (G) PV mRNA levels are decreased 60 min after light  
 981 stimulation measured by qPCR. qPCR measurements of control, 15 minutes, 30 minutes and 60  
 982 minutes after light stimulation. OptoTrkB reduces the expression of PV 60 minutes after stimulation.  
 983 One-way ANOVA ( $F(3, 11) = 5.112$ ;  $p = 0.0186$ ) with Bonferroni's post-hoc test comparing control  
 984 vs. 15 min, 30 min and 60 min (control vs. 15 min,  $p = > 0.9999$ ; control vs. 30 min,  $p = 0.1456$ ;  
 985 control vs. 60 min,  $p = 0.0125$ ).  $n = 3-4$  animals/group. Bars represent means  $\pm$  SEM. \*  $p < 0.05$   
 986

987

988

989

990

991

992

993

994

995

**A**

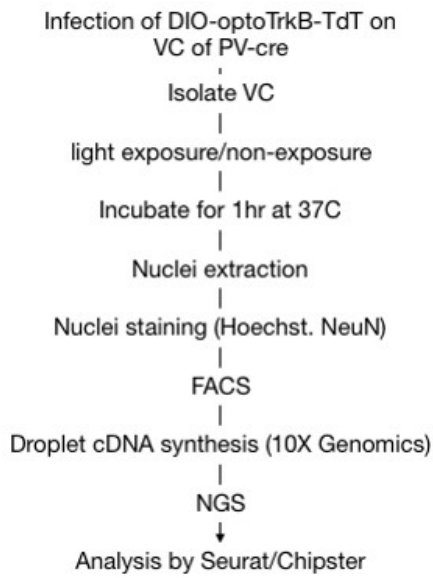

996

997

998

**B**

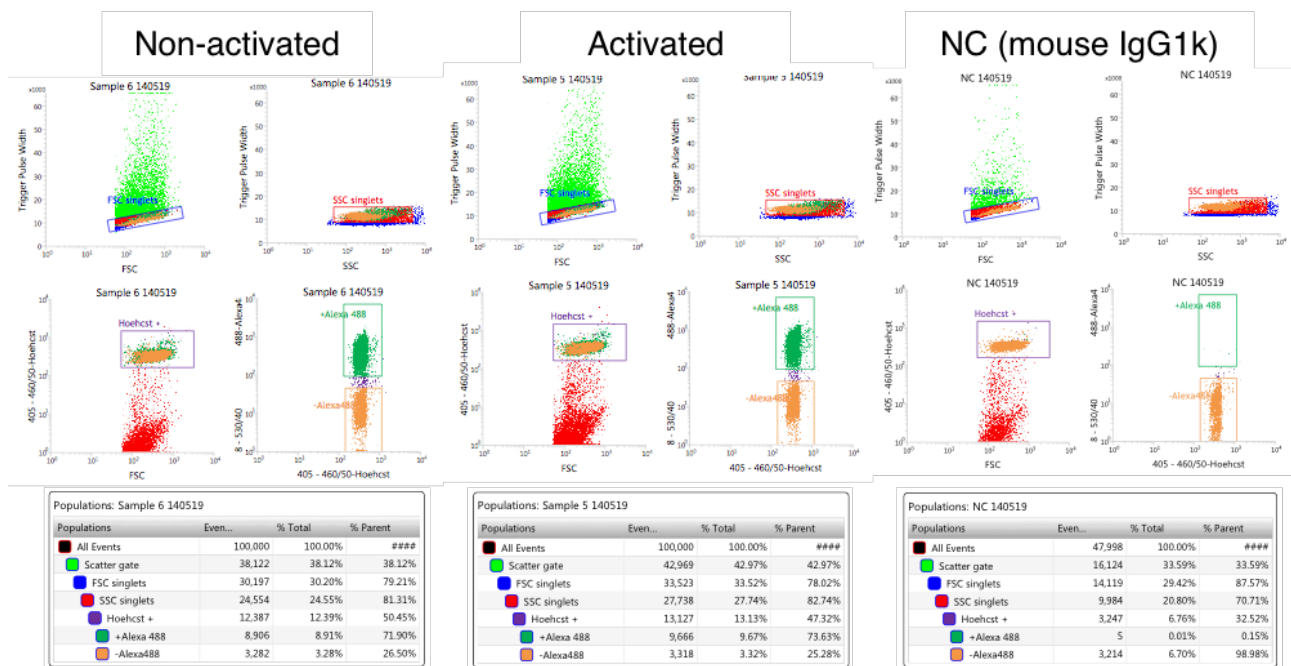

999

1000

1001

**Figure S3. snRNA-seq after activation of optoTrkB**

1002

(A) Scheme of snRNA-seq. The primary visual cortices were bilaterally isolated from PV mice transfected by DIO-optoTrkB-TdT. Nuclei were extracted from the tissue, and Hoechst+ and NeuN+ cells were sorted by FACS. A cDNA library was constructed with Poly (A)-RNA in droplets. The fragmented cDNA, were then sequenced on a Next generation sequencer (NGS). (B) Sorting nuclei of neurons by FACS. Cells were stained with Hoechst 33342, NeuN antibody, and mouse IgG antibody (negative control) followed by labelling with anti-mouse IgG conjugated with Alexa488, and then sorted by BD Influx cell sorter (BD Biosciences). Hoechst 33342 positive nuclei were efficiently sorted in all samples. While small portion of nuclei (0.15%) labelled with IgG bound to Alexa488 were sorted in negative control, large portion of nuclei (~72%) stained with NeuN bound to Alexa488 were efficiently sorted and collected.

1003

1004

1005

1006

1007

1008

1009

1010

1011

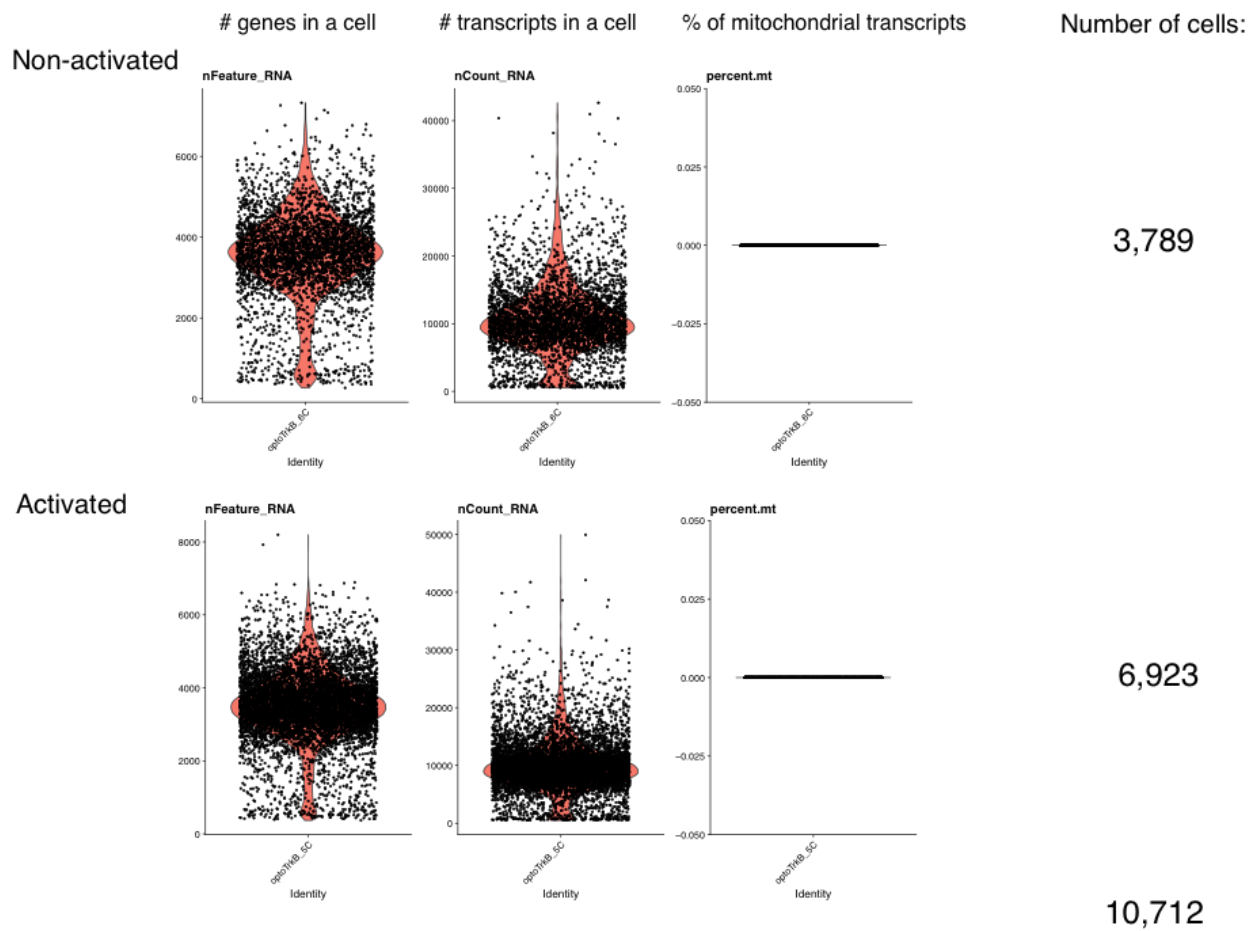

1012

1013 **Figure S4. Number of genes, reads, and mitochondrial genes in nuclei.**

1014 The plots represent genes and transcripts per cell, where the horizontal axis is cell id and vertical  
1015 axis is the number of genes or transcripts, respectively. Each dot is a unique cell and orange areas  
1016 represent cell density at vertical axis. In the right panels, the horizontal axis is cell id and the vertical  
1017 axis is the percentage of transcripts originating from mitochondrial DNA. Each cell should be  
1018 represented with a dot and the black line in 0.000 % shows absence of mitochondrial genes. Since  
1019 we used only nuclei, mitochondrial genes are absent. Based on genes and transcripts per cell, we  
1020 decided to remove cells that had fewer than 100 or greater than 7000 reads.  
1021



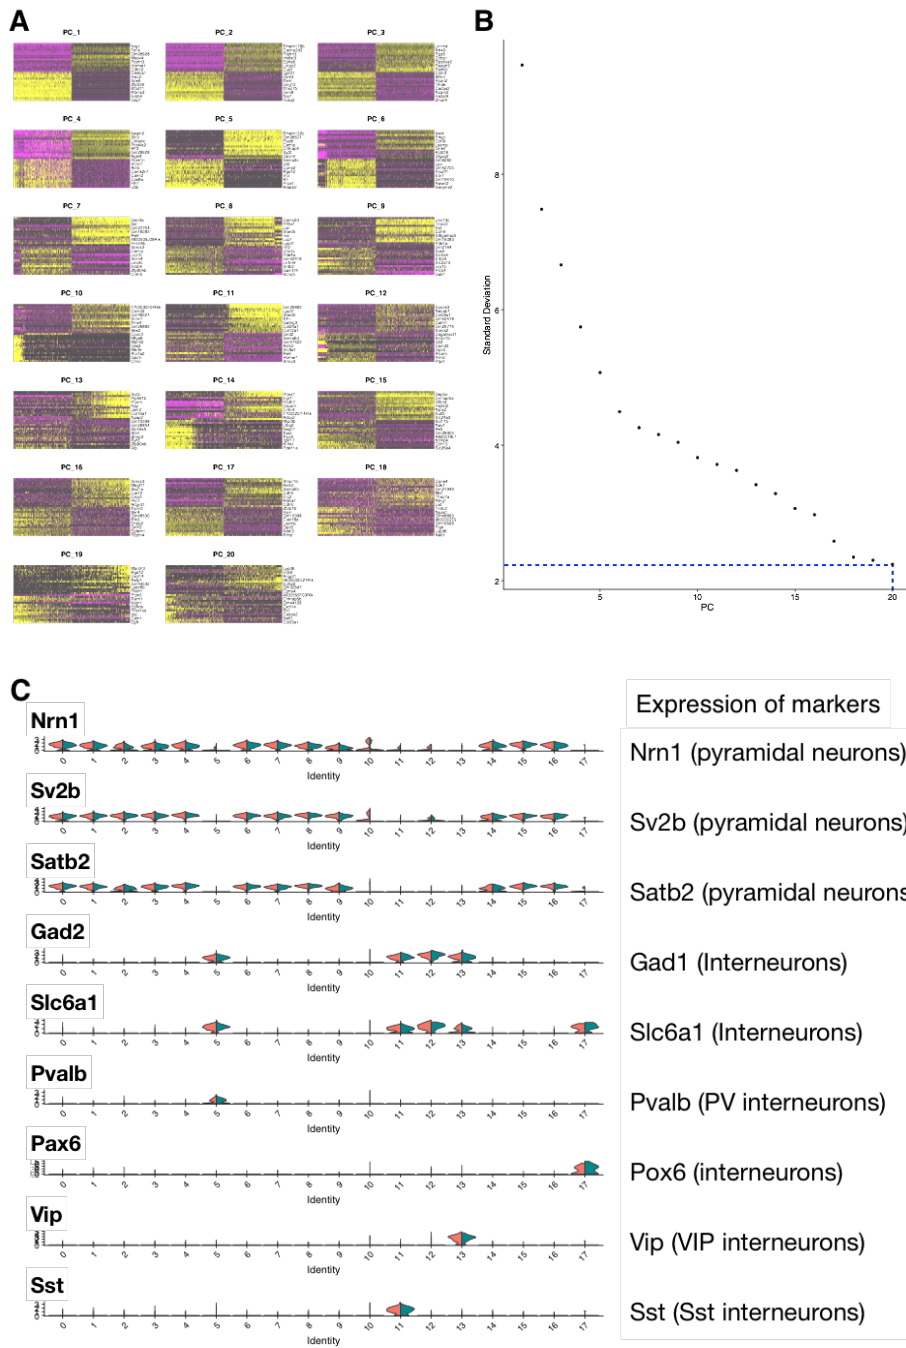

1022

1023

1024

**Figure S5. Clustering single nuclei**

(A) For 20 first principal components, heatmaps are drawn with cells as columns and the 15 most important genes as rows. The heatmaps show major variation captured in 20 first principal components. (B) Elbow plot is generated by calculating how much of the variation is explained by the first 20 principal components. Horizontal axis represents ordinal number of principal component and vertical axis the standard deviation of explained percentage in variation. Most of the variation in the data is included in 20 first principal components, which were used for later analysis. (C) In the violin plot, the vertical axis indicates the expression level of a gene in a cluster (number below), and the horizontal axis indicates cell density at a given expression level. Pyramidal neurons were identified by using the markers Nrn1, Sv2b and Satb2 and while interneurons were done by Gad1 and Slc6a1. The cluster 5, 11, and 13 contained parvalbumin-, somatostatin-, and VIP-positive interneurons, respectively.

1025

1026

1027

1028

1029

1030

1031

1032

1033

1034

1035

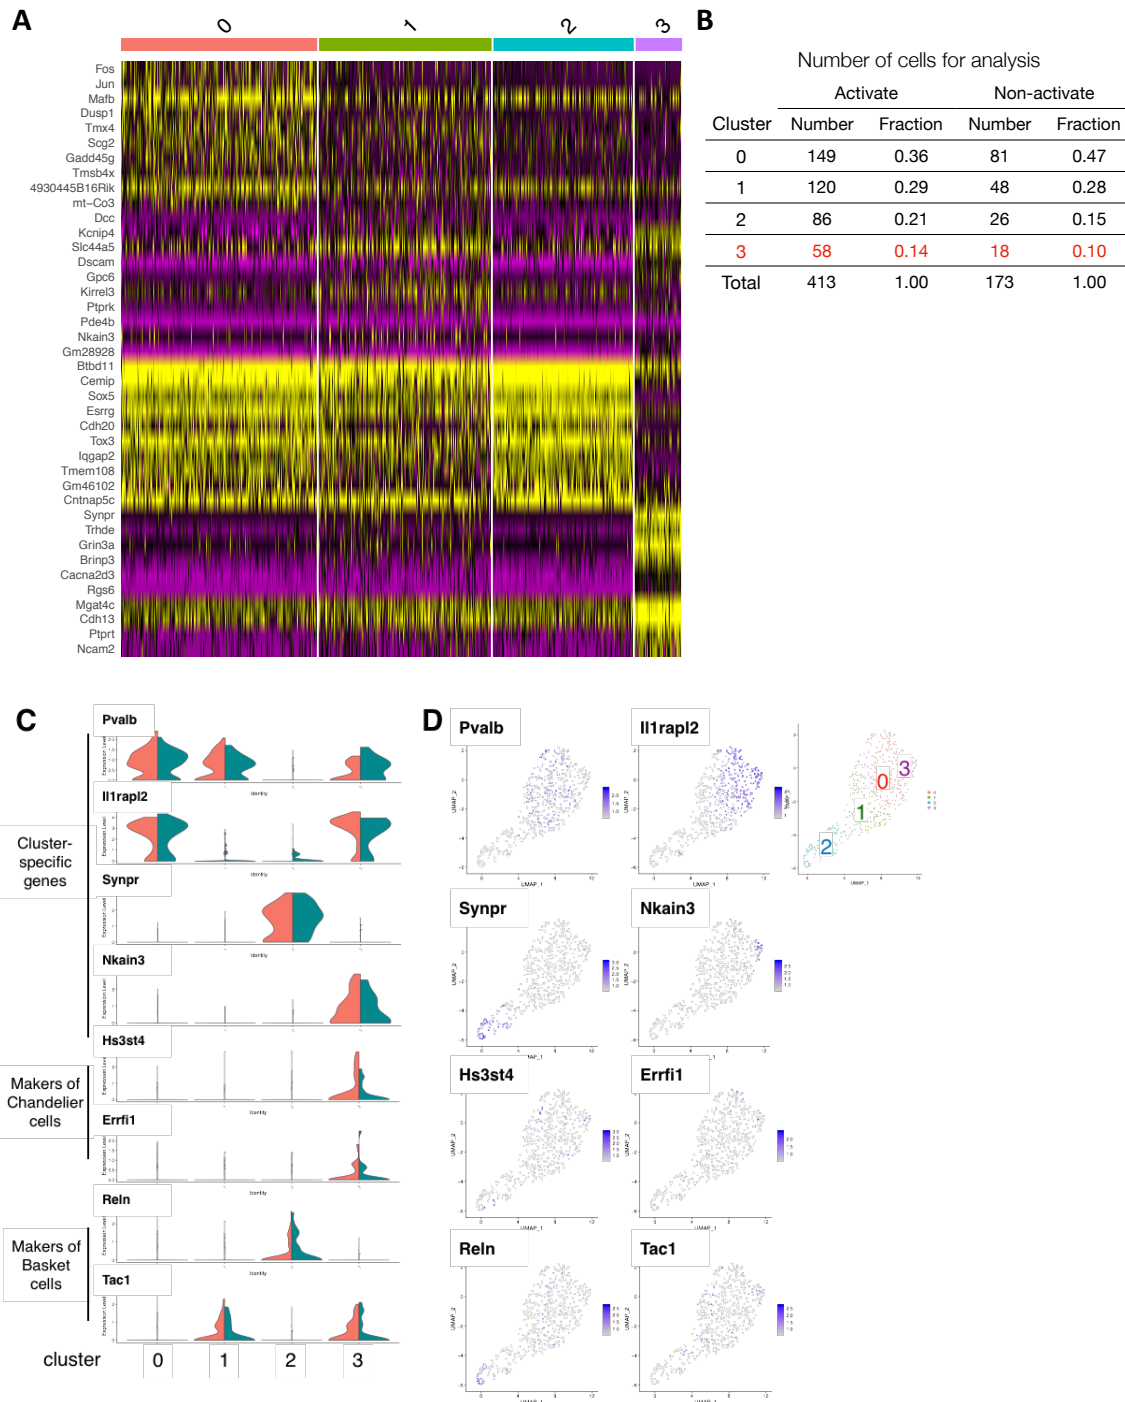

1036  
1037

1038  
1039

1040

1041

1042

1043

1044

1045

1046

1047

1048

1049

### Figure S6. Clustering PV interneuron

(A) Genes in representative PCAs explain four clusters in PV neurons. Heatmaps of unique genes in each clusters show that the PV cluster can be further divided into four clusters (0-3). (B) Number and ratio of PV cells used for clustering and DE analysis. (C) Distribution of expression of genes in cluster specific genes (*Pvalb*, *Il1rapl2*, *Synpr*, *Nkain3*), representative markers for chandelier cells (*Hs3st4*, *Errfi1*), and basket cells (*Reln*, *Tac1*) as reported previously (Tasic et al., 2018). (D) Distribution of cells expressing each marker in the four clusters of PV interneurons. These results demonstrate that each cluster has unique expression of marker genes, and the cluster 3 includes both chandelier and basket cells.

1050

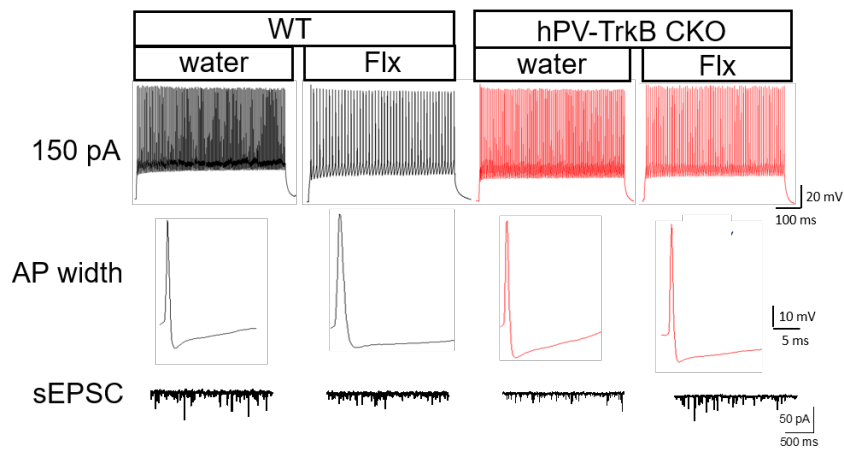

1051

1052

**Figure S7. Representative traces of electrophysiological recordings**

1053

Representative traces used to estimate intrinsic excitability (150 pA, top row), AP half-width (2nd

1054

row) and sEPSC (bottom row) in WT mice treated with water (first column), WT mice treated with

1055

Flx (2nd column), CKO mice treated with water (3rd column) and CKO mice treated with Flx (last

1056

column).

1057

1058

1059

1060

1061

1062

Number of cells in each cluster

| Cluster | Neuronal type <sup>a</sup> | Non-activated  |                | Activated      |                |
|---------|----------------------------|----------------|----------------|----------------|----------------|
|         |                            | N <sup>b</sup> | % <sup>c</sup> | N <sup>b</sup> | % <sup>c</sup> |
| 0       | Pyramidal                  | 696            | 18.4           | 1200           | 17.3           |
| 1       | Pyramidal                  | 349            | 9.2            | 874            | 12.6           |
| 2       | Pyramidal                  | 368            | 9.7            | 827            | 11.9           |
| 3       | Pyramidal                  | 390            | 10.3           | 746            | 10.8           |
| 4       | Pyramidal                  | 222            | 5.9            | 408            | 5.9            |
| 5       | Internuron                 | 173            | 4.6            | 413            | 6.0            |
| 6       | Pyramidal                  | 218            | 5.8            | 360            | 5.2            |
| 7       | Pyramidal                  | 172            | 4.5            | 334            | 4.8            |
| 8       | Pyramidal                  | 261            | 6.9            | 235            | 3.4            |
| 9       | Pyramidal                  | 192            | 5.1            | 293            | 4.2            |
| 10      | Pyramidal                  | 189            | 5.0            | 266            | 3.8            |
| 11      | Internuron                 | 146            | 3.9            | 237            | 3.4            |
| 12      | Internuron                 | 82             | 2.2            | 169            | 2.4            |
| 13      | Internuron                 | 82             | 2.2            | 164            | 2.4            |
| 14      | Pyramidal                  | 87             | 2.3            | 143            | 2.1            |
| 15      | Pyramidal                  | 68             | 1.8            | 130            | 1.9            |
| 16      | Pyramidal                  | 76             | 2.0            | 102            | 1.5            |
| 17      | Internuron                 | 14             | 0.4            | 20             | 0.3            |

1063

1064 **Table S1. Number of nuclei in each cluster.**

1065 (a) All clusters were identified by expression of makers previously reported (Tasic et al., 2018).

1066 (b) Number of cells in each cluster were provided by Chipster/Seurat version 3.

1067 (c) Percentage was calculated by dividing the number of nuclei in each cluster with that of total  
 1068 nuclei in non-activated or activated sample

1069

1070

**A**

| Input resistance   | Control | 10-30 min | 30-60 min |
|--------------------|---------|-----------|-----------|
| Mean               | 237.5   | 233.8     | 272.6     |
| Std. Deviation     | 63.99   | 58.7      | 77.3      |
| Std. Error of Mean | 26.12   | 22.19     | 31.56     |

**B**

| Input resistance   | WT water | WT Flx | hPV-TrkB<br>CKO water | hPV-TrkB<br>CKO Flx |
|--------------------|----------|--------|-----------------------|---------------------|
| Mean               | 171.2    | 251.2  | 189.4                 | 204.3               |
| Std. Deviation     | 46.84    | 69.45  | 55.23                 | 71.69               |
| Std. Error of Mean | 15.61    | 24.55  | 20.87                 | 20.69               |

1071

1072 **Table S6. Input resistance is after optoTrkB activation and fluoxetine treatment in WT and hPV-**  
1073 **TrkB CKO mice.**

1074 (A) Input resistance is unchanged after optoTrkB activation. (B) No effect of fluoxetine treatment on  
1075 input resistance in WT and hPV-TrkB CKO mice.

1076

1077

1078 **Supplemental Table 2. Markers in all clusters.**

1079 **Supplemental Table 3. DE genes after optoTrkB activation in all clusters**

1080 DE genes were identified by Chipster/Seurat version 3. Gene ontology (GO) in each gene was

1081 annotated by DAVID program

1082 **Supplemental Table 4. Marker genes in clusters of Parvalbumin interneurons**

1083 **Supplemental Table 5. DE genes after optoTrkB activation in clusters of Parvalbumin interneurons.**

1084 DE genes were identified by Chipster/Seurat version 3. GO in each gene was annotated by DAVID

1085 program

1086

1087

1088

1089  
1090  
1091  
1092  
1093  
1094  
1095  
1096  
1097  
1098  
1099  
1100  
1101  
1102  
1103  
1104  
1105  
1106  
1107  
1108  
1109  
1110  
1111  
1112  
1113  
1114  
1115  
1116  
1117  
1118  
1119  
1120  
1121  
1122  
1123  
1124  
1125  
1126

1127

1128

## 1129 **References**

- 1130 Bakken, T. E., Hodge, R. D., Miller, J. A., Yao, Z., Nguyen, T. N., Aevermann, B., Barkan, E.,  
1131 Bertagnolli, D., Casper, T., Dee, N., Garren, E., Goldy, J., Graybuck, L. T., Kroll, M., Lasken, R. S.,  
1132 Lathia, K., Parry, S., Rimorin, C., Scheuermann, R. H., ... Tasic, B. (2018). Single-nucleus and  
1133 single-cell transcriptomes compared in matched cortical cell types. *PLOS ONE*, *13*(12),  
1134 e0209648. <https://doi.org/10.1371/journal.pone.0209648>
- 1135 Bartos, M., Vida, I., & Jonas, P. (2007). Synaptic mechanisms of synchronized gamma oscillations in  
1136 inhibitory interneuron networks. In *Nature Reviews Neuroscience* (Vol. 8, Issue 1, pp. 45–56).  
1137 <https://doi.org/10.1038/nrn2044>
- 1138 Butler, A., Hoffman, P., Smibert, P., Papalexi, E., & Satija, R. (2018). Integrating single-cell  
1139 transcriptomic data across different conditions, technologies, and species. *Nature*  
1140 *Biotechnology*, *36*(5), 411–420. <https://doi.org/10.1038/nbt.4096>
- 1141 Cang, J., Kalatsky, V. a, Löwel, S., & Stryker, M. P. (2005). Optical imaging of the intrinsic signal as a  
1142 measure of cortical plasticity in the mouse. *Visual Neuroscience*, *22*(5), 685–691.  
1143 <https://doi.org/10.1017/S0952523805225178>
- 1144 Chang, K.-Y., Woo, D., Jung, H., Lee, S., Kim, S., Won, J., Kyung, T., Park, H., Kim, N., & Yang, H. W.  
1145 (2014). Light-inducible receptor tyrosine kinases that regulate neurotrophin signalling. *Nature*  
1146 *Communications*, *5*.
- 1147 Cole, S., Donoghue, T., Gao, R., & Voytek, B. (2019). *NeuroDSP: A package for neural digital signal*  
1148 *processing Software*. <https://doi.org/10.21105/joss.01272>
- 1149 Cubelos, B., Sebastián-Serrano, A., Beccari, L., Calcagnotto, M. E., Cisneros, E., Kim, S., Dopazo, A.,  
1150 Alvarez-Dolado, M., Redondo, J. M., Bovolenta, P., Walsh, C. A., & Nieto, M. (2010). Cux1 and  
1151 Cux2 regulate dendritic branching, spine morphology, and synapses of the upper layer  
1152 neurons of the cortex. *Neuron*, *66*(4), 523–535. <https://doi.org/10.1016/j.neuron.2010.04.038>

- 1153 Devienne, G., Picaud, S., Cohen, I., Piquet, J., Tricoire, L., Testa, D., Di Nardo, A. A., Rossier, J., Cauli,  
1154 B., & Lambolez, B. (2019). Regulation of perineuronal nets in the adult cortex by the electrical  
1155 activity of parvalbumin interneurons. *BioRxiv*. <https://doi.org/10.1101/671719>
- 1156 Dittgen, T., Nimmerjahn, A., Komai, S., Licznarski, P., Waters, J., Margrie, T. W., Helmchen, F., Denk,  
1157 W., Brecht, M., & Osten, P. (2004). Lentivirus-based genetic manipulations of cortical neurons  
1158 and their optical and electrophysiological monitoring in vivo. *Proceedings of the National  
1159 Academy of Sciences*, *101*(52), 18206–18211. <https://doi.org/10.1073/pnas.0407976101>
- 1160 Donato, F., Chowdhury, A., Donato, F., Chowdhury, A., Lahr, M., & Caroni, P. (2015). Early- and Late-  
1161 Born Parvalbumin Basket Cell Subpopulations Exhibiting Distinct Regulation and Roles in  
1162 Learning Article Early- and Late-Born Parvalbumin Basket Cell Subpopulations Exhibiting  
1163 Distinct Regulation and Roles in Learning. *Neuron*, *85*(4), 770–786.  
1164 <https://doi.org/10.1016/j.neuron.2015.01.011>
- 1165 Donato, F., Rompani, S. B., & Caroni, P. (2013). Parvalbumin-expressing basket-cell network  
1166 plasticity induced by experience regulates adult learning. *Nature*, *504*(7479), 272–276.  
1167 <https://doi.org/10.1038/nature12866>
- 1168 Du, J., Zhang, L., Weiser, M., Rudy, B., & McBain, C. J. (1996). Developmental expression and  
1169 functional characterization of the potassium-channel subunit Kv3.1b in parvalbumin-  
1170 containing interneurons of the rat hippocampus. *Journal of Neuroscience*.  
1171 <https://doi.org/10.1523/JNEUROSCI.16-02-00506.1996>
- 1172 Edgar, R., Domrachev, M., & Lash, A. E. (2002). Gene Expression Omnibus: NCBI gene expression  
1173 and hybridization array data repository (Vol. 30). Retrieved from <http://www.ninds.nih.gov/>
- 1174 Eggermann, E., & Jonas, P. (2012). How the “slow” Ca<sup>2+</sup> buffer parvalbumin affects transmitter  
1175 release in nanodomain-coupling regimes. *Nature Neuroscience*, *15*(1), 20–22.  
1176 <https://doi.org/10.1038/nn.3002>



- 1177 Fenno, L. E., Mattis, J., Ramakrishnan, C., Hyun, M., Lee, S. Y., He, M., Tucciarone, J., Selimbeyoglu,  
1178 A., Berndt, A., Grosenick, L., Zalocusky, K. A., Bernstein, H., Swanson, H., Perry, C., Diester, I.,  
1179 Boyce, F. M., Bass, C. E., Neve, R., Huang, Z. J., & Deisseroth, K. (2014). Targeting cells with  
1180 single vectors using multiple-feature Boolean logic. *Nature Methods*, *11*(7), 763–772.  
1181 <https://doi.org/10.1038/nmeth.2996>
- 1182 Fernando Maya-Vetencourt, J., Baroncelli, L., Viegi, A., Tiraboschi, E., Castren, E., Cattaneo, A., &  
1183 Maffei, L. (2012). IGF-1 Restores Visual Cortex Plasticity in Adult Life by Reducing Local GABA  
1184 Levels. *Neural Plasticity*, *2012*. <https://doi.org/10.1155/2012/250421>
- 1185 Figurov, A., Pozzo-Miller, L. D., Olafsson, P., Wang, T., & Lu, B. (1995). Regulation of synaptic  
1186 responses to high-frequency stimulation and LTP by neurotrophins in the hippocampus.  
1187 *Letters to Nature*, *12*(11), 3751–3765. <https://www.nature.com/articles/381706a0.pdf>
- 1188 Galuske, R. A. W., Munk, M. H. J., & Singer, W. (2019). Relation between gamma oscillations and  
1189 neuronal plasticity in the visual cortex. *Proceedings of the National Academy of Sciences of  
1190 the United States of America*, *116*(46), 23317–23325.  
1191 <https://doi.org/10.1073/pnas.1901277116>
- 1192 Gorba, T., & Wahle, P. (1999). Expression of TrkB and TrkC but not BDNF mRNA in neurochemically  
1193 identified interneurons in rat visual cortex *in vivo* and in organotypic cultures. *European  
1194 Journal of Neuroscience*, *11*(4), 1179–1190. [https://doi.org/10.1046/j.1460-  
1195 9568.1999.00551.x](https://doi.org/10.1046/j.1460-9568.1999.00551.x)
- 1196 Harauzov, A., Spolidoro, M., DiCristo, G., De Pasquale, R., Cancedda, L., Pizzorusso, T., Viegi, A.,  
1197 Berardi, N., & Maffei, L. (2010). Reducing intracortical inhibition in the adult visual cortex  
1198 promotes ocular dominance plasticity. *Journal of Neuroscience*, *30*(1), 361–371.
- 1199 Hensch, T. K. (2005). Critical period plasticity in local cortical circuits. *Nature Reviews.  
1200 Neuroscience*, *6*(11), 877–888. <https://doi.org/10.1038/nrn1787>

- 1201 Hioki, H., Kameda, H., Nakamura, H., Okunomiya, T., Ohira, K., Nakamura, K., Kuroda, M., Furuta, T.,  
1202 & Kaneko, T. (2007). Efficient gene transduction of neurons by lentivirus with enhanced  
1203 neuron-specific promoters. *Gene Therapy*, *14*(11), 872–882.  
1204 <https://doi.org/10.1038/sj.gt.3302924>
- 1205 Hippenmeyer, S., Vrieseling, E., Sigrist, M., Portmann, T., Laengle, C., Ladle, D. R., & Arber, S. (2005).  
1206 A Developmental Switch in the Response of DRG Neurons to ETS Transcription Factor  
1207 Signaling. *PLoS Biology*, *3*(5), e159. <https://doi.org/10.1371/journal.pbio.0030159>
- 1208 Hu, H., Gan, J., & Jonas, P. (2014). Fast-spiking, parvalbumin + GABAergic interneurons: From  
1209 cellular design to microcircuit function. *Science*, *345*(6196).  
1210 <https://doi.org/10.1126/science.1255263>
- 1211 Huang, D. W., Sherman, B. T., & Lempicki, R. A. (2009). Systematic and integrative analysis of large  
1212 gene lists using DAVID bioinformatics resources. *Nature Protocols*, *4*(1), 44–57.  
1213 <https://doi.org/10.1038/nprot.2008.211>
- 1214 Huang, J., Kirkwood, A., Pizzorusso, T., Porciatti, V., Morales, B., Bear, M. F., Maffei, L., & Tonegawa,  
1215 S. (1999). BDNF Regulates the Maturation of Inhibition and the Critical Period of Plasticity in  
1216 Mouse Visual Cortex. *Cell*, *98*(6), 739–755. [https://doi.org/10.1016/S0092-8674\(00\)81509-3](https://doi.org/10.1016/S0092-8674(00)81509-3)
- 1217 Itami, C., Kimura, F., & Nakamura, S. (2007). Brain-derived neurotrophic factor regulates the  
1218 maturation of layer 4 fast-spiking cells after the second postnatal week in the developing  
1219 barrel cortex. *Journal of Neuroscience*, *27*(9), 2241–2252.  
1220 <https://doi.org/10.1523/JNEUROSCI.3345-06.2007>
- 1221 Jack, A., Hamad, M. I. K., Gonda, S., Gralla, S., Pahl, S., Hollmann, M., & Wahle, P. (2019).  
1222 Development of Cortical Pyramidal Cell and Interneuronal Dendrites: a Role for Kainate  
1223 Receptor Subunits and NETO1. *Molecular Neurobiology*, *56*(7), 4960–4979.  
1224 <https://doi.org/10.1007/s12035-018-1414-0>

- 1225 Jiang, B., Huang, S., de Pasquale, R., Millman, D., Song, L., Lee, H.-K., Tsumoto, T., & Kirkwood, A.  
1226 (2010). The Maturation of GABAergic Transmission in Visual Cortex Requires  
1227 Endocannabinoid-Mediated LTD of Inhibitory Inputs during a Critical Period. *Neuron*, *66*(2),  
1228 248–259. <https://doi.org/10.1016/J.NEURON.2010.03.021>
- 1229 Jiang, B., Huang, Z. J., Morales, B., & Kirkwood, A. (2005). Maturation of GABAergic transmission  
1230 and the timing of plasticity in visual cortex. *Brain Research Reviews*, *50*(1), 126–133.  
1231 <https://doi.org/10.1016/j.brainresrev.2005.05.007>
- 1232 Kalatsky, V. A., & Stryker, M. P. (2003). New paradigm for optical imaging: temporally encoded  
1233 maps of intrinsic signal. *Neuron*, *38*(4), 529–545.
- 1234 Kallio, M. A., Tuimala, J. T., Hupponen, T., Klemelä, P., Gentile, M., Scheinin, I., Koski, M., Käki, J., &  
1235 Korpelainen, E. I. (2011). Chipster: user-friendly analysis software for microarray and other  
1236 high-throughput data. *BMC Genomics*, *12*(1), 507. <https://doi.org/10.1186/1471-2164-12-507>
- 1237 Kang, H., & Schuman, E. M. (1994). Long-lasting neurotrophin-induced enhancement of synaptic  
1238 transmission in the adult hippocampus. *Science*, *272*(6), 1644. <http://science.sciencemag.org/>
- 1239 Karpova, N. N., Pickenhagen, A., Lindholm, J., Tiraboschi, E., Kuleskaya, N., Ágústsdóttir, A., Antila,  
1240 H., Popova, D., Akamine, Y., & Sullivan, R. (2011). Fear erasure in mice requires synergy  
1241 between antidepressant drugs and extinction training. *Science*, *334*(6063), 1731–1734.
- 1242 Karunakaran, S., Chowdhury, A., Donato, F., Quairiaux, C., Michel, C. M., & Caroni, P. (2016). PV  
1243 plasticity sustained through D1/5 dopamine signaling required for long-term memory  
1244 consolidation. *Nature Neuroscience*, *19*(3), 454–464. <https://doi.org/10.1038/nn.4231>
- 1245 Kennedy, M. J., Hughes, R. M., Peteya, L. A., Schwartz, J. W., Ehlers, M. D., & Tucker, C. L. (2010).  
1246 Rapid blue-light-mediated induction of protein interactions in living cells. *Nature Methods*,  
1247 *7*(12), 973–975. <https://doi.org/10.1038/nmeth.1524>
- 1248 Kirkwood, A., & Bear, M. F. F. (1994). Hebbian synapses in visual cortex. *The Journal of*

- 1249 *Neuroscience*, 14(3), 3404.
- 1250 <http://www.jneurosci.org/content/14/5/3404.short><http://www.jneurosci.org/content/14/3/1634.short>
- 1251 4/3/1634.short
- 1252 Kirkwood, Alfredo, Rioult, M. G. M. G., & Bear, M. F. M. F. (1996). Experience-dependent  
1253 modification of synaptic plasticity in visual cortex. In *Nature* (Vol. 381, Issue 6582, pp. 526–  
1254 528). <https://doi.org/10.1038/381526a0>
- 1255 Korotkova, T., Fuchs, E. C., Ponomarenko, A., von Engelhardt, J., & Monyer, H. (2010). NMDA  
1256 Receptor Ablation on Parvalbumin-Positive Interneurons Impairs Hippocampal Synchrony,  
1257 Spatial Representations, and Working Memory. *Neuron*, 68(3), 557–569.  
1258 <https://doi.org/10.1016/j.neuron.2010.09.017>
- 1259 Krishnaswami, S. R., Grindberg, R. V, Novotny, M., Venepally, P., Lacar, B., Bhutani, K., Linker, S. B.,  
1260 Pham, S., Erwin, J. A., Miller, J. A., Hodge, R., McCarthy, J. K., Kelder, M., McCorrison, J.,  
1261 Aevertmann, B. D., Fuertes, F. D., Scheuermann, R. H., Lee, J., Lein, E. S., ... Lasken, R. S. (2016).  
1262 Using single nuclei for RNA-seq to capture the transcriptome of postmortem neurons. In  
1263 *Nature Protocols* (Vol. 11, Issue 3). Nature Publishing Group.  
1264 <https://doi.org/10.1038/nprot.2016.015>
- 1265 Kuczewski, N., Porcher, C., Lessmann, V., Medina, I., & Gaiarsa, J. L. (2009). Activity-dependent  
1266 dendritic release of BDNF and biological consequences. In *Molecular Neurobiology* (Vol. 39,  
1267 Issue 1, pp. 37–49). Humana Press. <https://doi.org/10.1007/s12035-009-8050-7>
- 1268 Kügler, S., Meyn, L., Holzmüller, H., Gerhardt, E., Isenmann, S., Schulz, J. B., & Bähr, M. (2001).  
1269 Neuron-Specific Expression of Therapeutic Proteins: Evaluation of Different Cellular Promoters  
1270 in Recombinant Adenoviral Vectors. *Molecular and Cellular Neuroscience*, 17(1), 78–96.  
1271 <https://doi.org/10.1006/MCNE.2000.0929>
- 1272 Lee, G., & Saito, I. (1998). Role of nucleotide sequences of loxP spacer region in Cre-mediated

- 1273 recombination. *Gene*, 216(1), 55–65. [https://doi.org/10.1016/S0378-1119\(98\)00325-4](https://doi.org/10.1016/S0378-1119(98)00325-4)
- 1274 Lee, S. H., Kwan, A. C., Zhang, S., Phoumthipphavong, V., Flannery, J. G., Masmanidis, S. C.,  
1275 Taniguchi, H., Huang, Z. J., Zhang, F., Boyden, E. S., Deisseroth, K., & Dan, Y. (2012). Activation  
1276 of specific interneurons improves V1 feature selectivity and visual perception. *Nature*,  
1277 488(7411), 379–383. <https://doi.org/10.1038/nature11312>
- 1278 Lensjø, K. K., Lepperød, M. E., Dick, G., Hafting, T., & Fyhn, M. (2017). Removal of perineuronal nets  
1279 unlocks juvenile plasticity through network mechanisms of decreased inhibition and increased  
1280 gamma activity. *Journal of Neuroscience*, 37(5), 1269–1283.
- 1281 Levine, E. S., Crozier, R. A., Black, I. B., & Plummer, M. R. (1998). Brain-derived neurotrophic factor  
1282 modulates hippocampal synaptic transmission by increasing N-methyl-D-aspartic acid  
1283 receptor activity. *Proceedings of the National Academy of Sciences of the United States of*  
1284 *America*, 95(17), 10235–10239. <https://doi.org/10.1073/pnas.95.17.10235>
- 1285 Levine, E. S., Dreyfus, C. F., Black, I. B., & Plummer, M. R. (1995). Brain-derived neurotrophic factor  
1286 rapidly enhances synaptic transmission in hippocampal neurons via postsynaptic tyrosine  
1287 kinase receptors. *Proc. Natl. Acad. Sci. USA*, 92(August), 8074–8077.
- 1288 Madisen, L., Zwingman, T. A., Sunkin, S. M., Oh, S. W., Zariwala, H. A., Gu, H., Ng, L. L., Palmiter, R.  
1289 D., Hawrylycz, M. J., Jones, A. R., Lein, E. S., & Zeng, H. (2010). A robust and high-throughput  
1290 Cre reporting and characterization system for the whole mouse brain. *Nature Neuroscience*,  
1291 13(1), 133–140. <https://doi.org/10.1038/nn.2467>
- 1292 Maya-Vetencourt, Jose Fernando, Sale, A., Viegi, A., Baroncelli, L., De Pasquale, R., O’Leary, O. F.,  
1293 Castren, E., & Maffei, L. (2008). The Antidepressant Fluoxetine Restores Plasticity in the Adult  
1294 Visual Cortex. *Science*, 319(3), 1490–1492.
- 1295 McInnes, L., Healy, J., Saul, N., & Großberger, L. (2018). *UMAP: Uniform Manifold Approximation*  
1296 *and Projection Software*. <https://doi.org/10.21105/joss.00861>

- 1297 Meabon, J. S., de Laat, R., Ieguchi, K., Serbzhinsky, D., Hudson, M. P., Huber, B. R., Wiley, J. C., &  
1298 Bothwell, M. (2016). Intracellular LINGO-1 negatively regulates Trk neurotrophin receptor  
1299 signaling. *Molecular and Cellular Neuroscience*, *70*, 1–10.  
1300 <https://doi.org/10.1016/j.mcn.2015.11.002>
- 1301 Messaoudi, E., Kanhema, T., Soulé, J., Tiron, A., Dageyte, G., Da Silva, B., & Bramham, C. R. (2007).  
1302 Sustained Arc/Arg3.1 synthesis controls long-term potentiation consolidation through  
1303 regulation of local actin polymerization in the dentate gyrus in vivo. *Journal of Neuroscience*,  
1304 *27*(39), 10445–10455. <https://doi.org/10.1523/JNEUROSCI.2883-07.2007>
- 1305 Messaoudi, E., Ying, S. W., Kanhema, T., Croll, S. D., & Bramham, C. R. (2002). Brain-derived  
1306 neurotrophic factor triggers transcription-dependent, late phase long-term potentiation in  
1307 vivo. *Journal of Neuroscience*, *22*(17), 7453–7461. [https://doi.org/10.1523/jneurosci.22-17-](https://doi.org/10.1523/jneurosci.22-17-07453.2002)  
1308 [07453.2002](https://doi.org/10.1523/jneurosci.22-17-07453.2002)
- 1309 Mikics, É., Guirado, R., Umemori, J., Tóth, M., Biró, L., Miskolczi, C., Balázsfi, D., Zelena, D., Castrén,  
1310 E., Haller, J., & Karpova, N. N. (2018). Social Learning Requires Plasticity Enhanced by  
1311 Fluoxetine Through Prefrontal Bdnf-TrkB Signaling to Limit Aggression Induced by Post-  
1312 Weaning Social Isolation. *Neuropsychopharmacology*, *43*(2), 235–245.  
1313 <https://doi.org/10.1038/npp.2017.142>
- 1314 Minichiello, L. (2009). TrkB signalling pathways in LTP and learning. *Nature Reviews Neuroscience*,  
1315 *10*(12), 850–860. <https://doi.org/10.1038/nrn2738>
- 1316 Minichiello, L., Korte, M., Wolfner, D., Ku, R., Unsicker, K., Cestari, V., Rossi-arnaud, C., Lipp, H.,  
1317 Bonhoeffer, T., Zu, C., Psicologia, D., Sapienza, L., & Moro, P. A. (1999). Essential Role for TrkB  
1318 Receptors in Hippocampus-Mediated Learning University of Heidelberg. *Neuron*, *24*(2), 401–  
1319 414.
- 1320 Pizzorusso, T., Medini, P., Berardi, N., Chierzi, S., Fawcett, J. W., & Maffei, L. (2002). Reactivation of

- 1321 Ocular Dominance Plasticity in the Adult Visual Cortex. *Science*, 298(5596), 1248–1251.  
1322 <https://doi.org/10.1126/SCIENCE.1072699>
- 1323 Plotkin, J. L., Wu, N., Chesselet, M.-F., & Levine, M. S. (2005). Functional and molecular  
1324 development of striatal fast-spiking GABAergic interneurons and their cortical inputs.  
1325 *European Journal of Neuroscience*, 22(5), 1097–1108. [https://doi.org/10.1111/j.1460-](https://doi.org/10.1111/j.1460-9568.2005.04303.x)  
1326 [9568.2005.04303.x](https://doi.org/10.1111/j.1460-9568.2005.04303.x)
- 1327 Rudy, B., Chow, A., Lau, D., Amarillo, Y., Ozaita, A., Saganich, M., Moreno, H., Nadal, M. S.,  
1328 Hernandez-Pineda, R., Hernandez-Cruz, A., Erisir, A., Leonard, C., Eleazar, A., & De Miera, V.-S.  
1329 (1999). Contributions of Kv3 Channels to Neuronal Excitability. *Annals of the New York*  
1330 *Academy of Sciences*, 868(1), 304–343.  
1331 <https://s3.amazonaws.com/academia.edu.documents/1947634/j.1749->
- 1332 Sale, A., Maya Vetencourt, J. F., Medini, P., Cenni, M. C., Baroncelli, L., De Pasquale, R., & Maffei, L.  
1333 (2007). Environmental enrichment in adulthood promotes amblyopia recovery through a  
1334 reduction of intracortical inhibition. *Nature Neuroscience*, 10(6), 679–681.  
1335 <https://doi.org/10.1038/nn1899>
- 1336 Schneider, C. A., Rasband, W. S., & Eliceiri, K. W. (2012, July 28). NIH Image to ImageJ: 25 years of  
1337 image analysis. *Nature Methods*. Nature Publishing Group.  
1338 <https://doi.org/10.1038/nmeth.2089>
- 1339 Segerstråle, M., Juuri, J., Lanore, F., Piepponen, P., Lauri, S. E., Mülle, C., & Taira, T. (2010). High  
1340 firing rate of neonatal hippocampal interneurons is caused by attenuation of  
1341 afterhyperpolarizing potassium currents by tonically active kainate receptors. *Journal of*  
1342 *Neuroscience*, 30(19), 6507–6514. <https://doi.org/10.1523/JNEUROSCI.4856-09.2010>
- 1343 Shah, M. M., Hammond, R. S., & Hoffman, D. A. (2010). Dendritic ion channel trafficking and  
1344 plasticity. In *Trends in Neurosciences* (Vol. 33, Issue 7, pp. 307–316). NIH Public Access.

- 1345 <https://doi.org/10.1016/j.tins.2010.03.002>
- 1346 Shaner, N. C., Campbell, R. E., Steinbach, P. A., Giepmans, B. N. G., Palmer, A. E., & Tsien, R. Y.  
1347 (2004). Improved monomeric red, orange and yellow fluorescent proteins derived from  
1348 *Discosoma* sp. red fluorescent protein. *Nature Biotechnology*, 22(12), 1567–1572.  
1349 <https://doi.org/10.1038/nbt1037>
- 1350 Song, P., & Kaczmarek, L. K. (2006). Modulation of Kv3.1b potassium channel phosphorylation in  
1351 auditory neurons by conventional and novel protein kinase C isozymes. *The Journal of*  
1352 *Biological Chemistry*, 281(22), 15582–15591. <https://doi.org/10.1074/jbc.M512866200>
- 1353 Steinzeig, A., Molotkov, D., & Castrén, E. (2017). Chronic imaging through “transparent skull” in  
1354 mice. *PLOS ONE*, 12(8), e0181788. <https://doi.org/10.1371/journal.pone.0181788>
- 1355 Tasic, B., Yao, Z., Graybuck, L. T., Smith, K. A., Nguyen, T. N., Bertagnolli, D., Goldy, J., Garren, E.,  
1356 Economo, M. N., Viswanathan, S., Penn, O., Bakken, T., Menon, V., Miller, J., Fong, O.,  
1357 Hirokawa, K. E., Lathia, K., Rimorin, C., Tieu, M., ... Zeng, H. (2018). Shared and distinct  
1358 transcriptomic cell types across neocortical areas. *Nature*, 563(7729), 72–78.  
1359 <https://doi.org/10.1038/s41586-018-0654-5>
- 1360 Ting, J. T., Daigle, T. L., Chen, Q., & Feng, G. (2014). *Acute Brain Slice Methods for Adult and Aging*  
1361 *Animals: Application of Targeted Patch Clamp Analysis and Optogenetics* (pp. 221–242).  
1362 Humana Press, New York, NY. [https://doi.org/10.1007/978-1-4939-1096-0\\_14](https://doi.org/10.1007/978-1-4939-1096-0_14)
- 1363 Tiscornia, G., Singer, O., & Verma, I. M. (2006). Production and purification of lentiviral vectors.  
1364 *Nature Protocols*, 1(1), 241–245. <https://doi.org/10.1038/nprot.2006.37>
- 1365 Umemori, J., Winkel, F., Castrén, E., & Karpova, N. N. (2015). Distinct effects of perinatal exposure  
1366 to fluoxetine or methylmercury on parvalbumin and perineuronal nets, the markers of critical  
1367 periods in brain development. *International Journal of Developmental Neuroscience*, 44, 55–  
1368 64. <https://doi.org/10.1016/j.ijdevneu.2015.05.006>



- 1369 Voigt, M. B., & Kral, A. (2019). Cathodic-leading pulses are more effective than anodic-leading  
1370 pulses in intracortical microstimulation of the auditory cortex. *Journal of Neural Engineering*,  
1371 *16*(3). <https://doi.org/10.1088/1741-2552/ab0944>
- 1372 Weber, K., Mock, U., Petrowitz, B., Bartsch, U., & Fehse, B. (2010). Lentiviral gene ontology (LeGO)  
1373 vectors equipped with novel drug-selectable fluorescent proteins: new building blocks for cell  
1374 marking and multi-gene analysis. *Gene Therapy*, *17*(4), 511–520.  
1375 <https://doi.org/10.1038/gt.2009.149>
- 1376 Wu, H., Kirita, Y., Donnelly, E. L., & Humphreys, B. D. (2019). Advantages of single-nucleus over  
1377 single-cell RNA sequencing of adult kidney: Rare cell types and novel cell states revealed in  
1378 fibrosis. *Journal of the American Society of Nephrology*, *30*(1), 23–32.  
1379 <https://doi.org/10.1681/ASN.2018090912>
- 1380 Yamada, J., Ohgomori, T., & Jinno, S. (2015). Perineuronal nets affect parvalbumin expression in  
1381 GABAergic neurons of the mouse hippocampus. *European Journal of Neuroscience*, *41*(3),  
1382 368–378. <https://doi.org/10.1111/ejn.12792>
- 1383 Yin, Y., Edelman, G. M., & Vanderklish, P. W. (2002). The brain-derived neurotrophic factor  
1384 enhances synthesis of Arc in synaptoneuroosomes. *Proceedings of the National Academy of*  
1385 *Sciences of the United States of America*, *99*(4), 2368–2373.  
1386 <https://doi.org/10.1073/pnas.042693699>
- 1387 Ying, S. W., Futter, M., Rosenblum, K., Webber, M. J., Hunt, S. P., Bliss, T. V. P., & Bramham, C. R.  
1388 (2002). Brain-derived neurotrophic factor induces long-term potentiation in intact adult  
1389 hippocampus: Requirement for ERK activation coupled to CREB and upregulation of Arc  
1390 synthesis. *Journal of Neuroscience*, *22*(5), 1532–1540. [https://doi.org/10.1523/jneurosci.22-](https://doi.org/10.1523/jneurosci.22-05-01532.2002)  
1391 [05-01532.2002](https://doi.org/10.1523/jneurosci.22-05-01532.2002)
- 1392 Zhang, Z. W., Peterson, M., & Liu, H. (2013). Essential role of postsynaptic NMDA receptors in

1393 developmental refinement of excitatory synapses. *Proceedings of the National Academy of*  
1394 *Sciences of the United States of America*, 110(3), 1095–1100.  
1395 <https://doi.org/10.1073/pnas.1212971110>  
1396 Zheng, W.-H., & Quirion, R. (2004). Comparative signaling pathways of insulin-like growth factor-1  
1397 and brain-derived neurotrophic factor in hippocampal neurons and the role of the PI3 kinase  
1398 pathway in cell survival. *Journal of Neurochemistry*, 89(4), 844–852.  
1399 <https://doi.org/10.1111/j.1471-4159.2004.02350.x>  
1400
